# Supplementary material for: IGF1R/IR Mediates Resistance to BRAF and MEK Inhibitors in BRAF-Mutant Melanoma
Source: MDPI journal article supplement (doi:10.3390/cancers13225863), 2021-11-22
Supplement: s1 [file s1]

*Supplementary Files*

# **IGF1R/IR Mediates Resistance to BRAF and MEK Inhibitors in BRAF-Mutant Melanoma**

**Hima Patel, Rosalin Mishra, Nour Yacoub, Samar Alanazi, Mary Kate Kilroy and Joan T. Garrett**

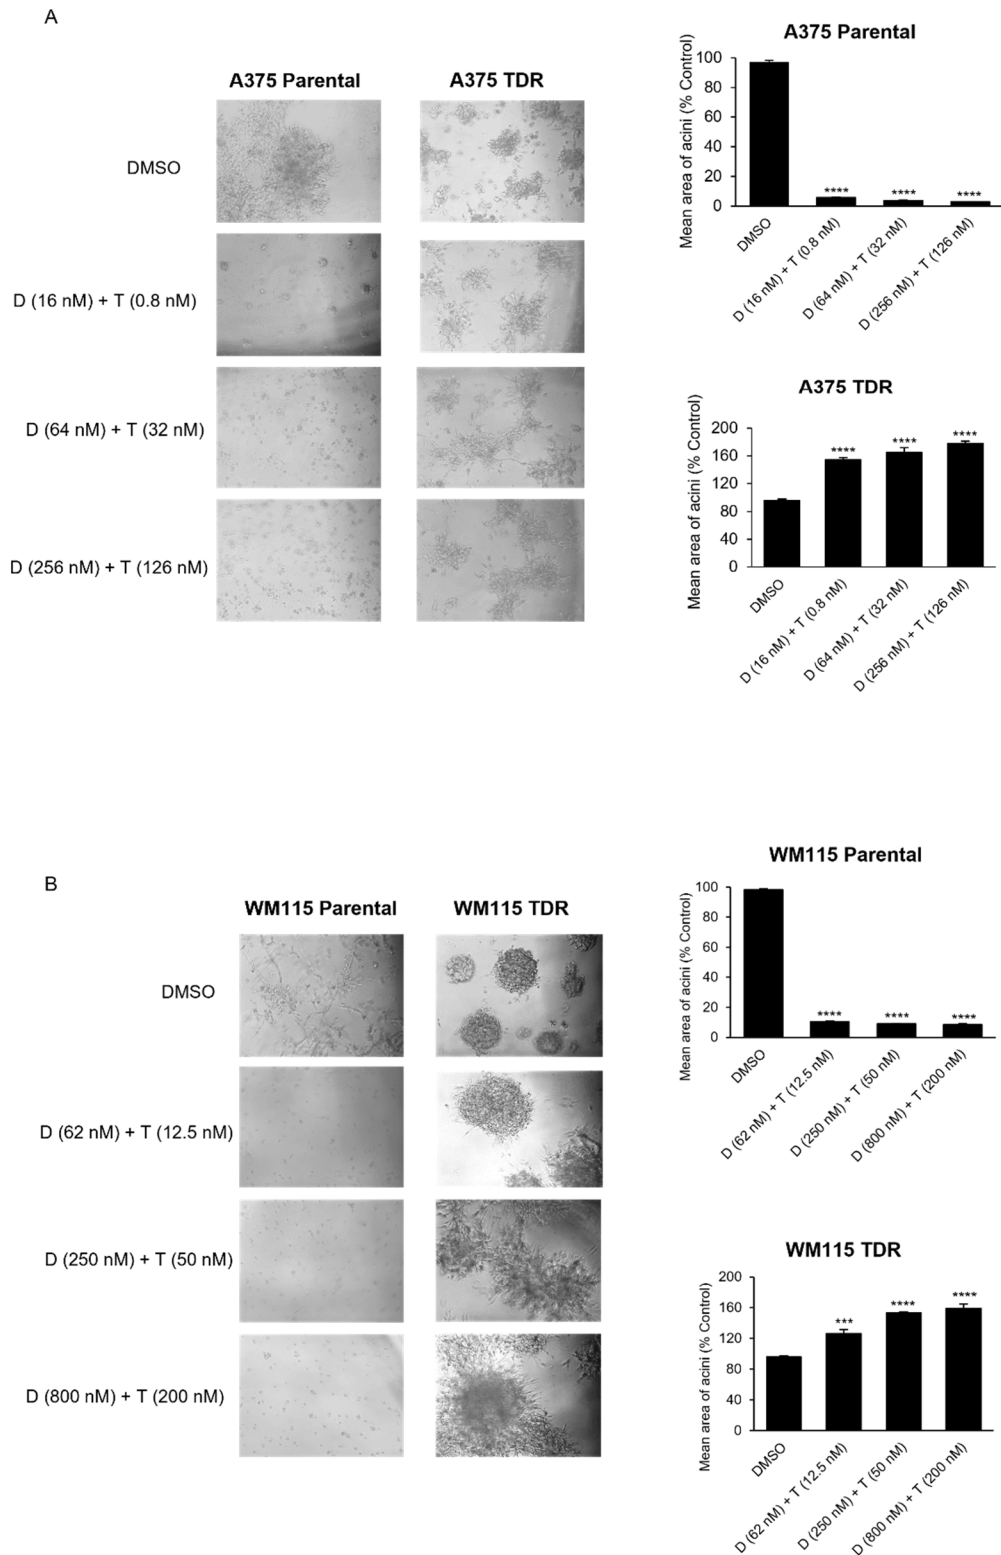

**Figure S1.** Dabrafenib and trametinib inhibit growth of parental cells but not TDR cells. (A) A375 and (B) WM115 Parental and TDR cells (2 x 10<sup>4</sup> cells/well) were seeded on matrigel basement membrane and treated with indicated drugs every second day. 5 pictures of different areas of each well were captured on day 21 (left panel) at 10× magnification. Quantification of mean area of acini (Right panel).\*\*\*  $p < 0.001$ ; \*\*\*\*  $p < 0.0001$  by two-tailed Student's t-test compared to DMSO group.

A

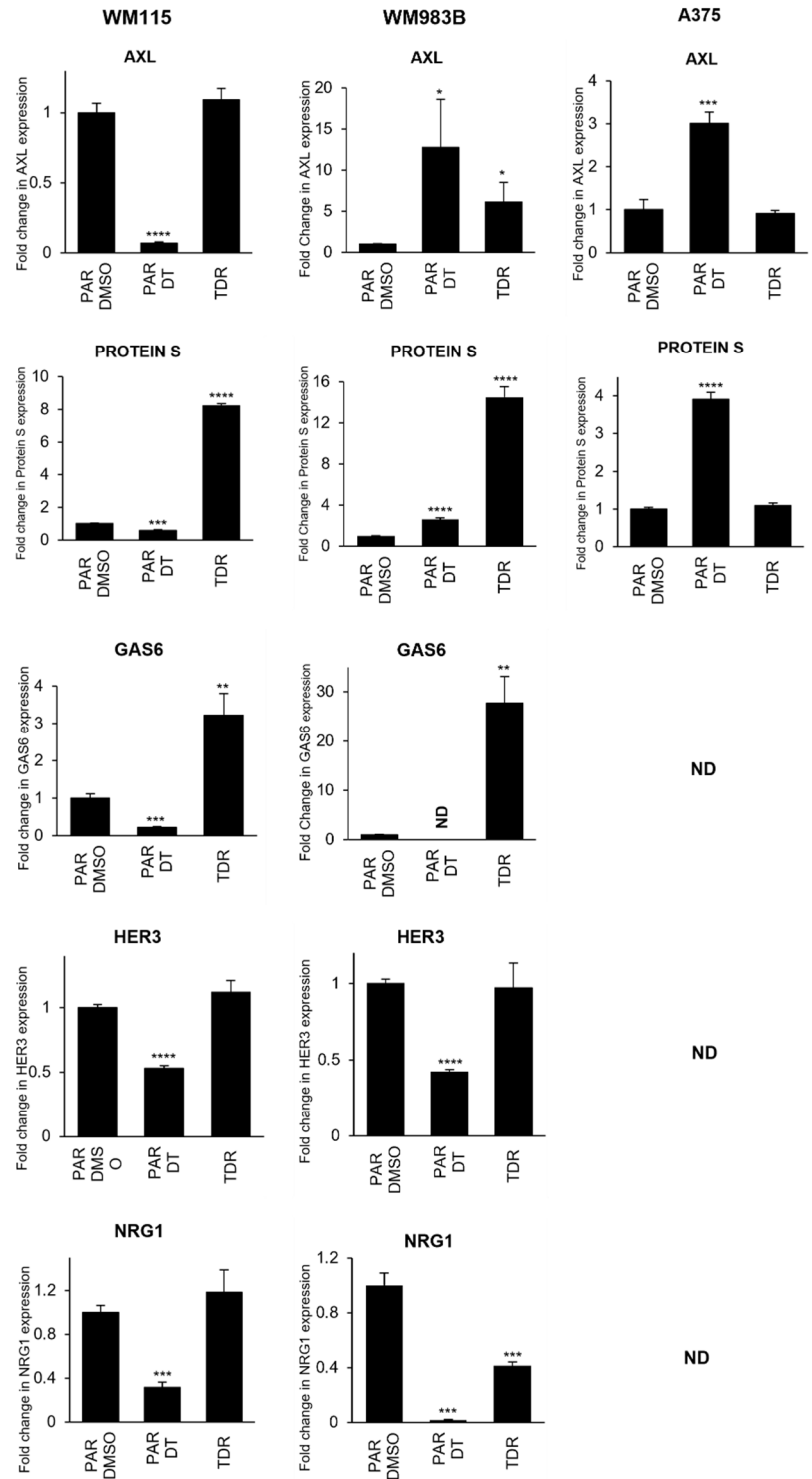

B

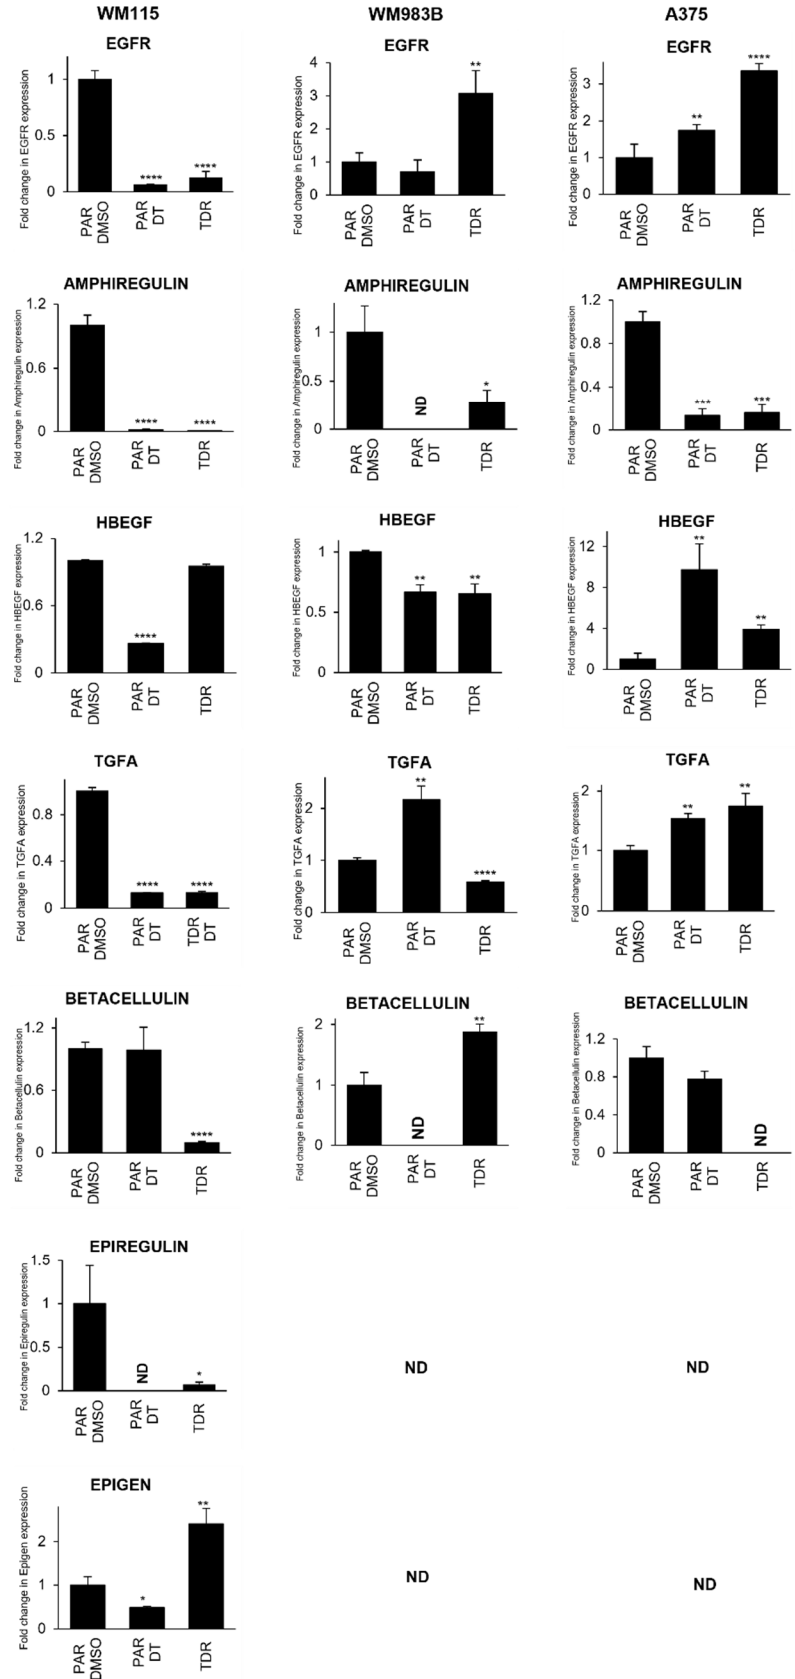

**Figure S2.** mRNA expression of AXL, HER3, EGFR and their ligands in parental and TDR cells. Quantification of Actin- normalized mRNA levels using real-time quantitative PCR for (A) AXL, PROTEIN S, GAS6, HER3, NRG1 and (B) EGFR, AMPHIREGULIN, HBEGF, TGFA, BETACELLULIN, EPIREGLIN, EPIGEN for parental cells treated with DMSO or dabrafenib

(D) + trametinib (T) (WM115: D: 800 nM, T: 200 nM; WM983B: D: 2.4  $\mu$ M, T: 500 nM; A375: D: 250 nM, T: 12.5 nM) and TDR following 24 hours of treatment. \*  $p < 0.05$ ; \*\*  $p < 0.01$ ; \*\*\*  $p < 0.001$ ; \*\*\*\*  $p < 0.0001$  by two-tailed Student's  $t$ -test. ND: Not detectable.

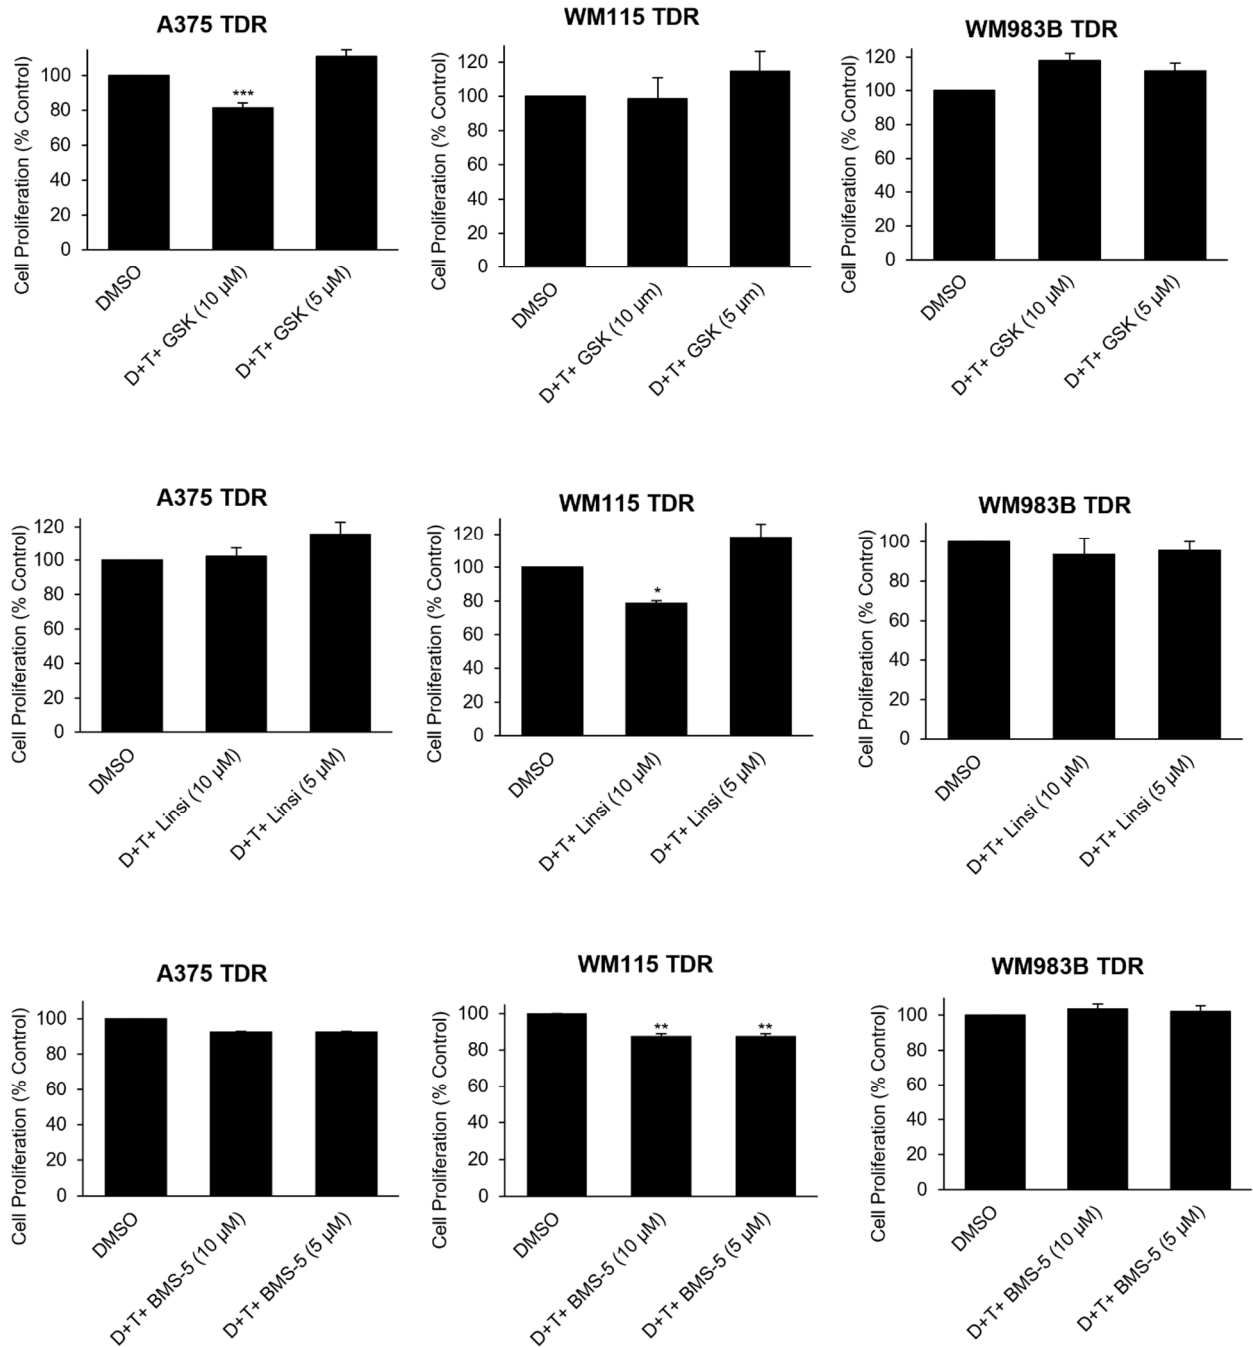

**Figure S3.** Effect of Linsitinib, BMS-536924 and GSK1838705A on TDR cell proliferation. TDR cells (WM115, WM983B and A375;  $1 \times 10^4$  cells/well) plated for 24 h and treated with DMSO, dabrafenib (D) and trametinib (T) (WM115: D: 800 nM, T: 200 nM; WM983B: D: 2.4  $\mu$ M, T: 500 nM; A375: D: 250 nM, T: 12.5 nM) in combination with Linsitinib (Linsi), BMS-536924 (BMS-5) and GSK1838705A (GSK) (5  $\mu$ M and 10  $\mu$ M) and treated with MTT. The intensities are represented as mean, Error bars: SEM \*  $p < 0.05$ , \*\*  $p < 0.01$ , \*\*\*  $p < 0.001$  by two-tailed Student's  $t$ -test compared to DMSO group.

A

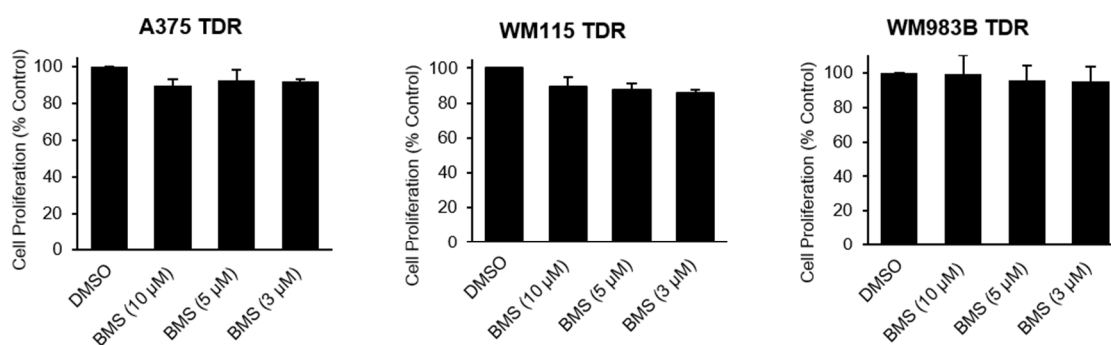

B

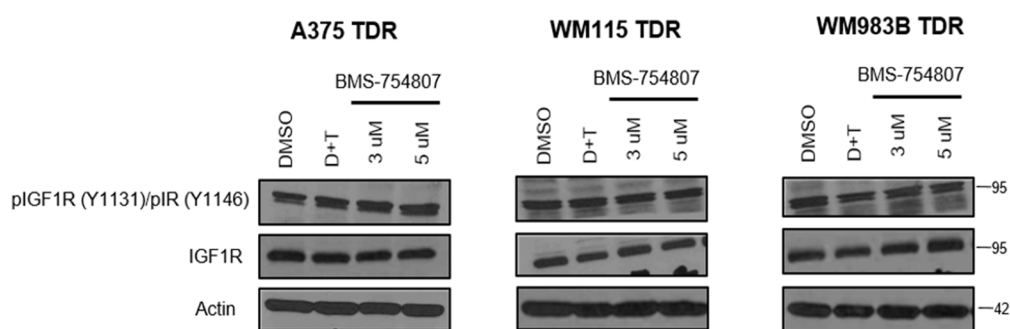

**Figure S4.** BMS-754807 does not inhibit proliferation and p-IGF1R/p-IR expression in TDR cells. **(A)** TDR cells (WM115, WM983B and A375) were plated and treated with DMSO, BMS-754807 (BMS; 10  $\mu$ M, 5  $\mu$ M or 3  $\mu$ M) for 72 h. Cells were treated with MTT for 4 h and absorbance was read at 570 nm. Data are presented as mean  $\pm$  SEM. **(B)** Immunoblots for A375, WM115 and WM983B TDR cells treated with DMSO, dabrafenib (D) and trametinib (T) (WM115 TDR: D: 800 nM, T: 200 nM; WM983B TDR: D: 2.4  $\mu$ M, T: 500 nM; A375 TDR: D: 250 nM, T: 12.5 nM), or BMS-754807 (5  $\mu$ M or 3  $\mu$ M) for 24 h. Whole cell lysates were analyzed for western blot using indicated antibodies. Actin used as loading control.

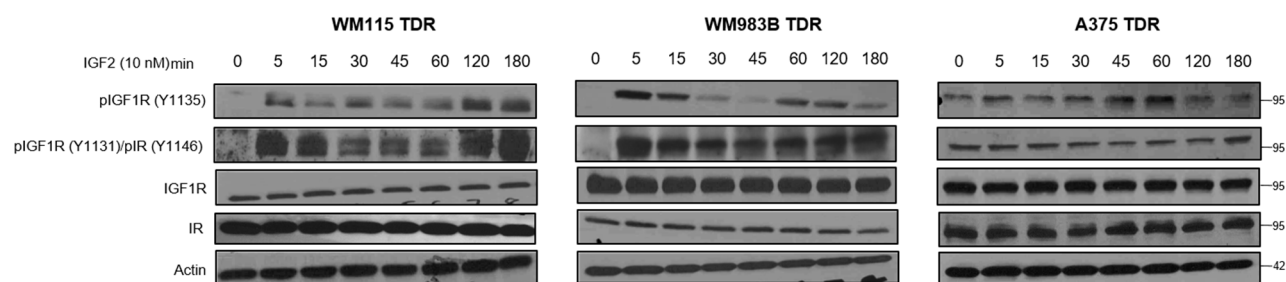

**Figure S5.** IGF2 dependent activation of IGF1R and IR in TDR cells. TDR cells were serum starved for 24 h and treated with IGF2 (10 nM) for indicated time. Whole cell lysates were analyzed for western blot using indicated antibodies. Actin used as loading control.

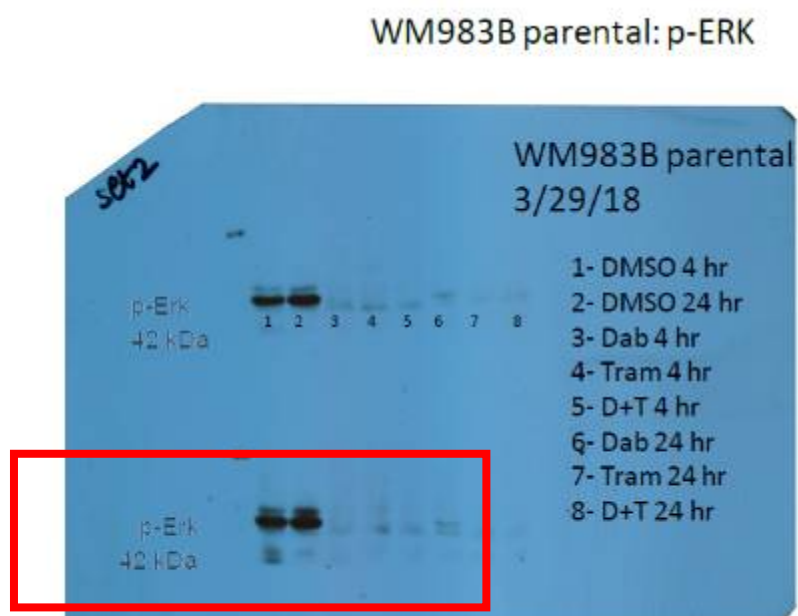

Figure 1D  
WM983B parental - ERK

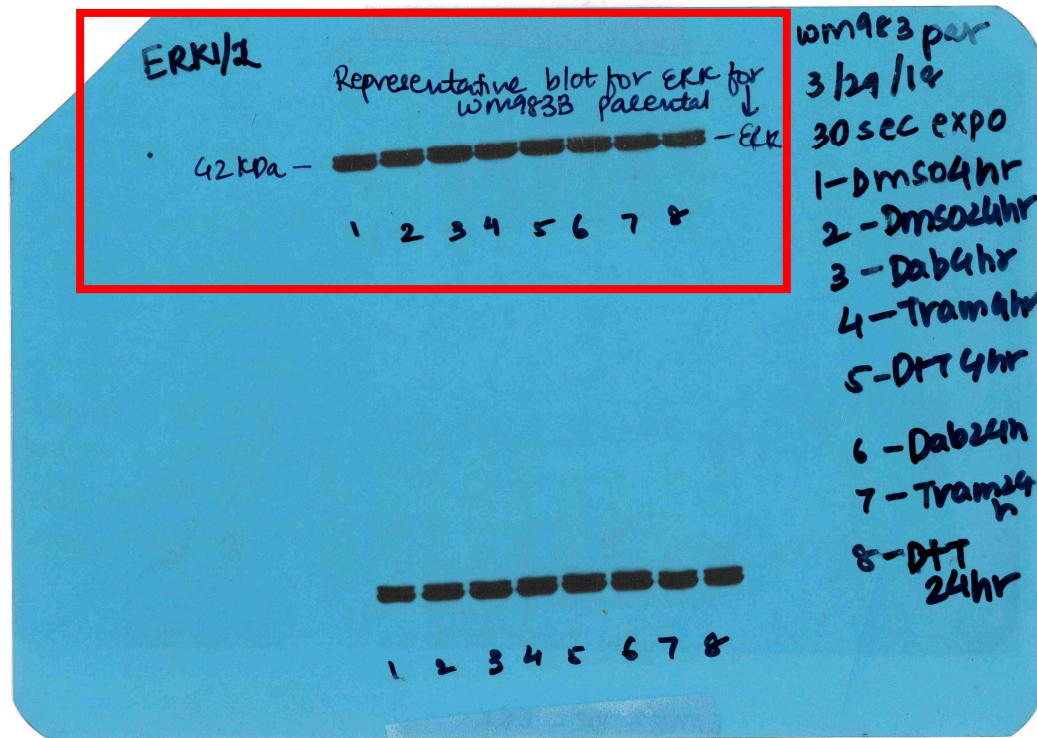

WM983B parental - Actin

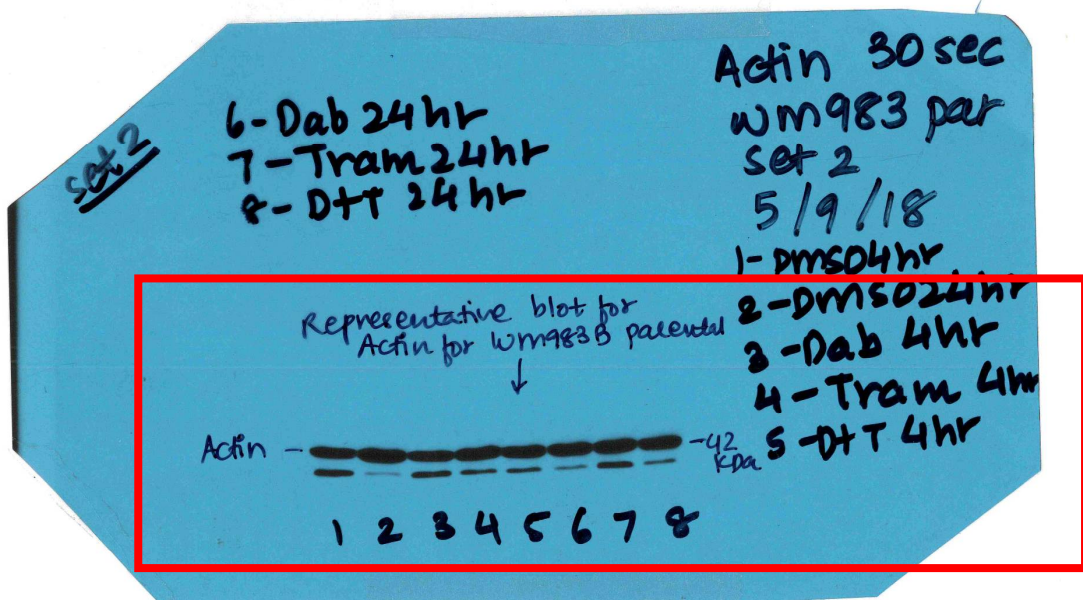



WM983 TDR - p-Erk

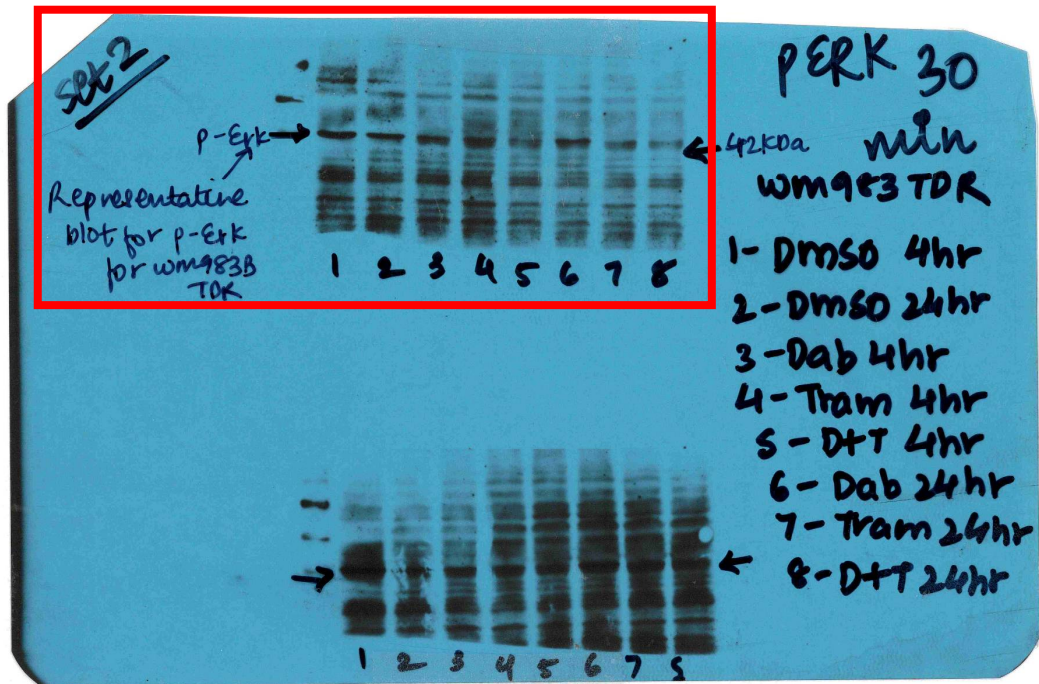

WM983 TDR - ERK

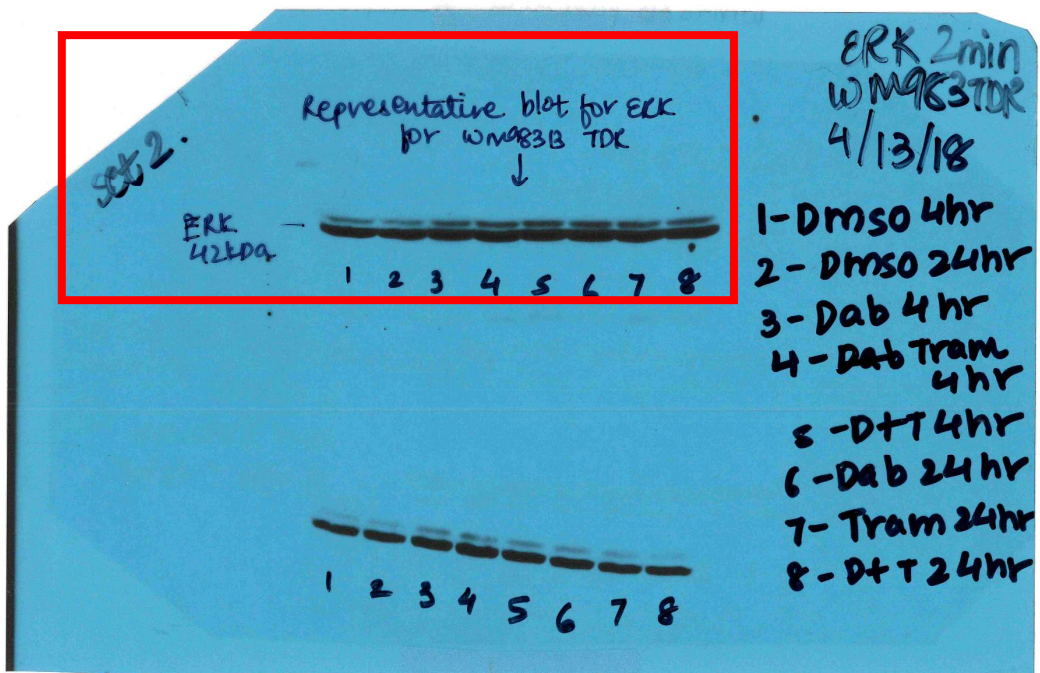

WM983 TDR- Actin

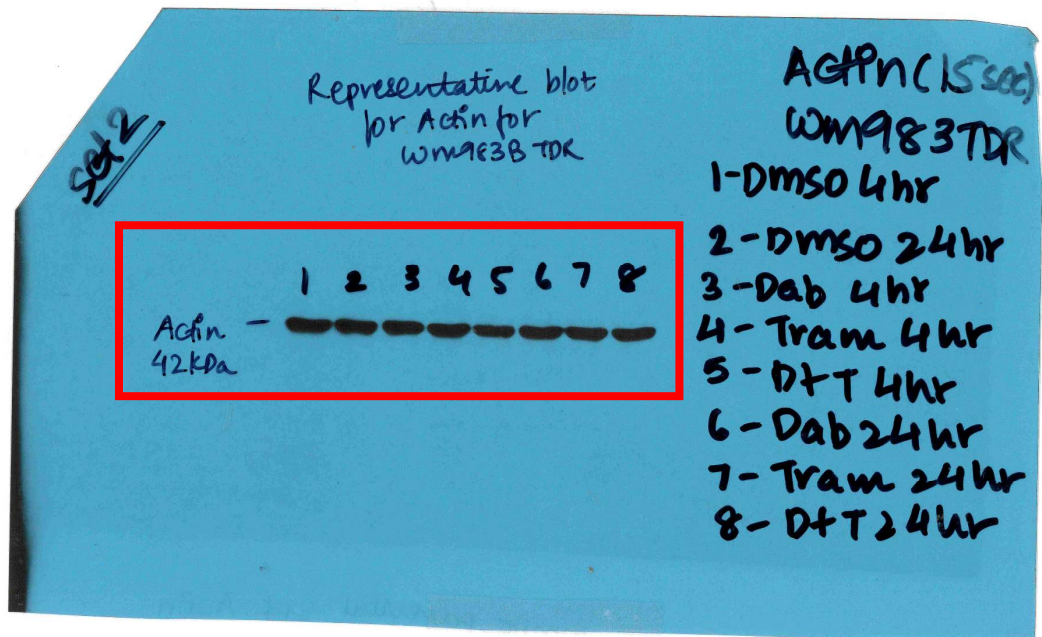



wm115 parental p-Erk

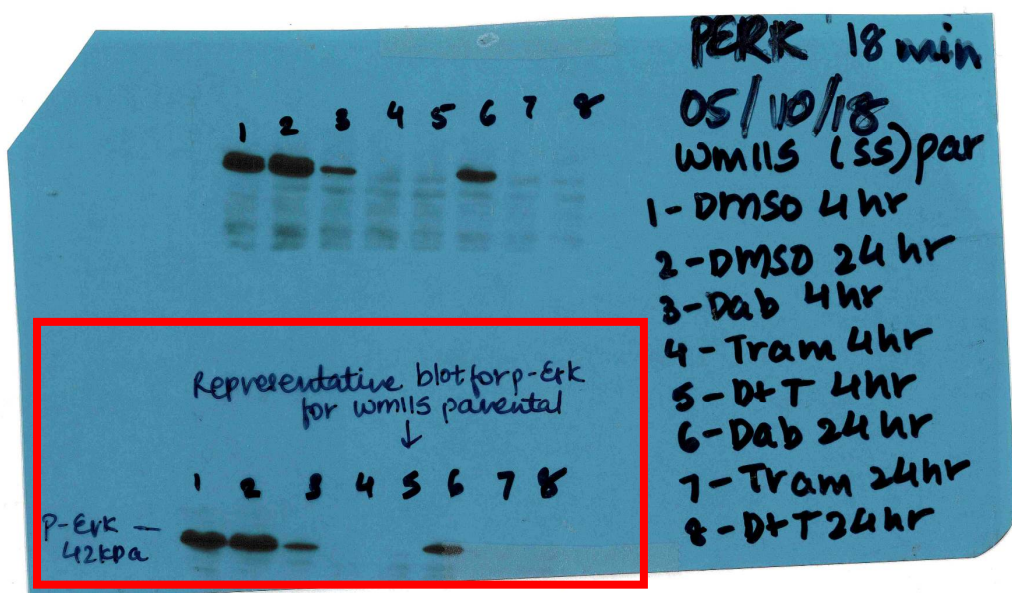

wm115 parental - Erk, Actin

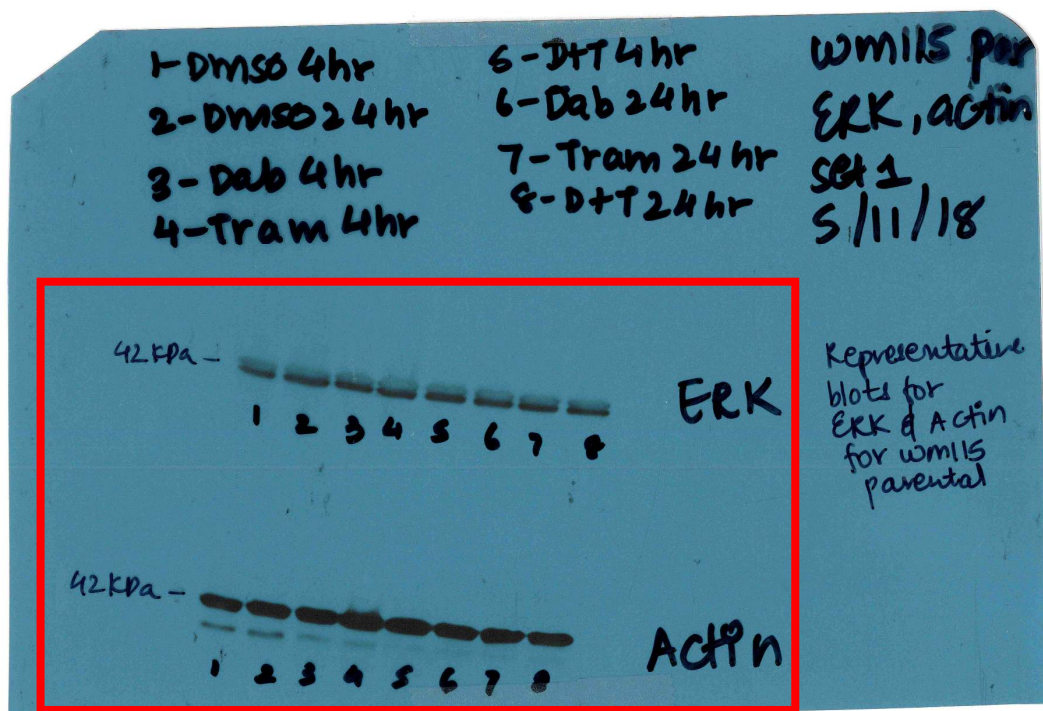

Wm115 TDR: p-Erk

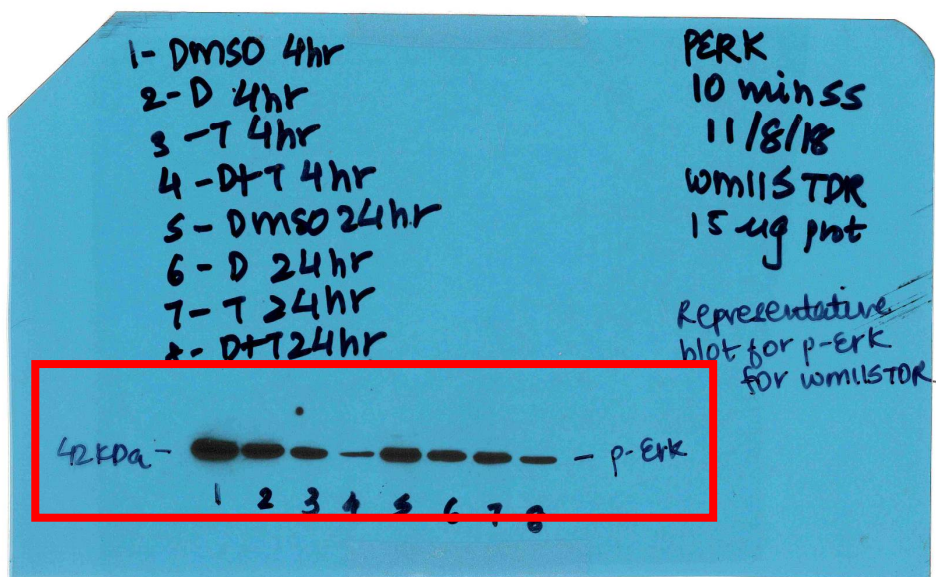

Wm115 TDR: ERK

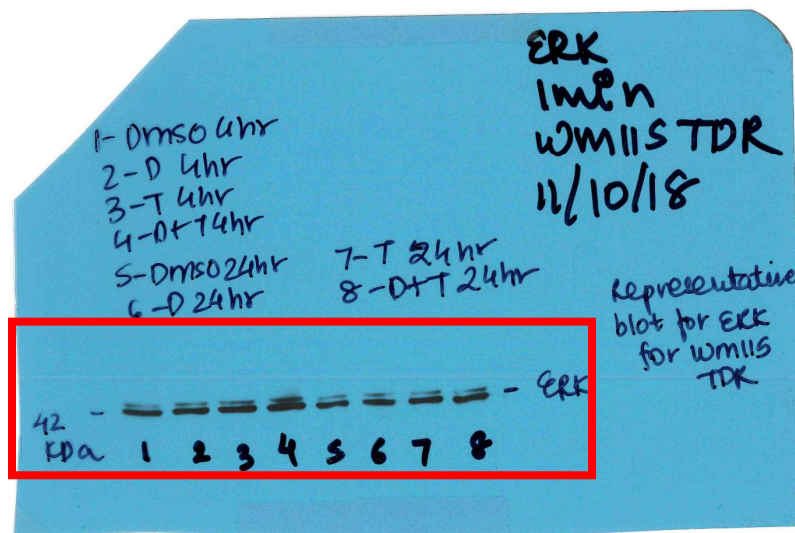

Wml15TOR: Actin

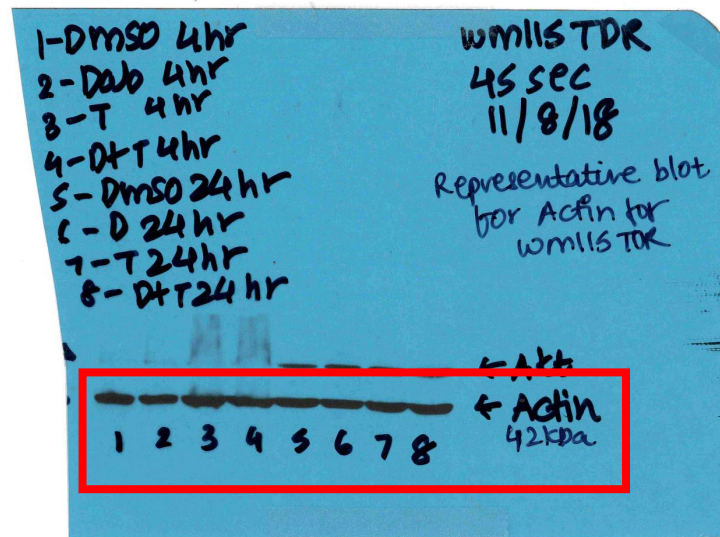

A375 parental: p-ERK

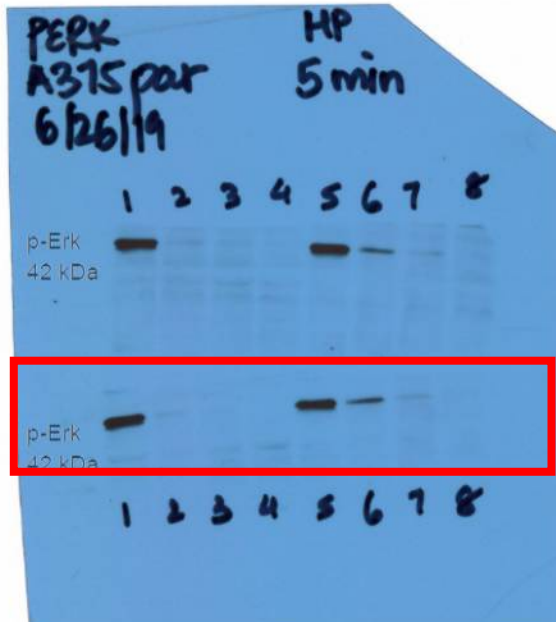

- 1 - DMSO 4 hr
- 2 - Dab 4 hr
- 3 - Tram 4 hr
- 4 - D+T 4 hr
- 5 - DMSO 24 hr
- 6 - Dab 24 hr
- 7 - Tram 24 hr
- 8 - D+T 24 hr



A375 parental: erk

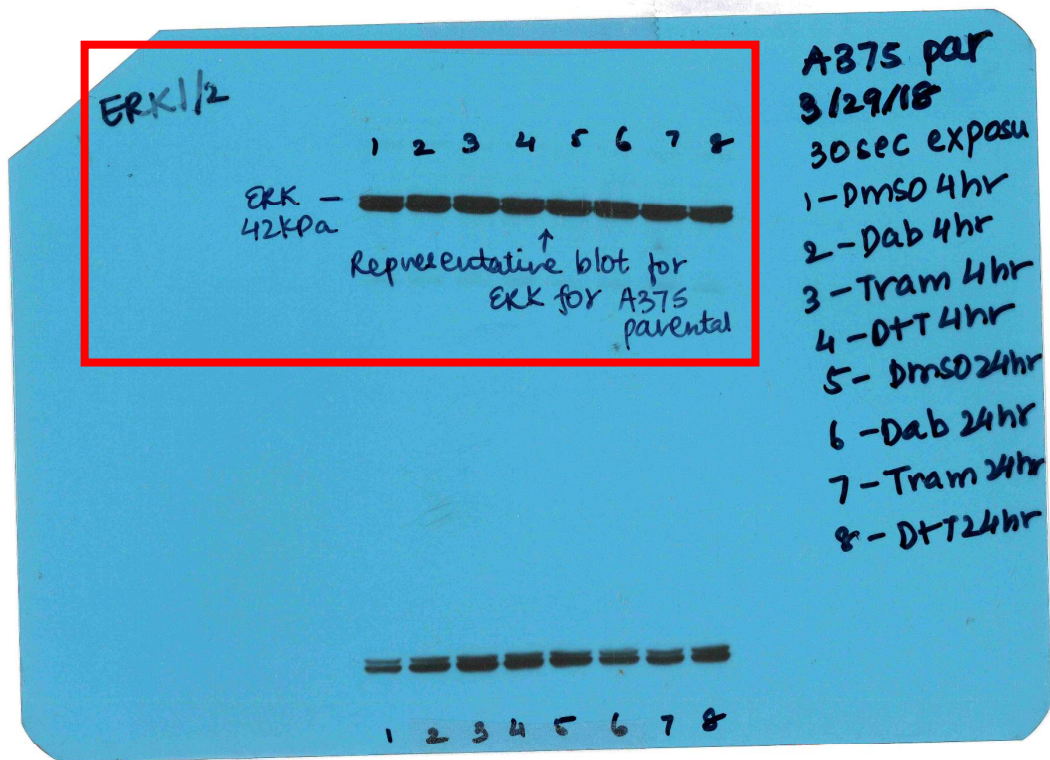

A375 parental: Actin

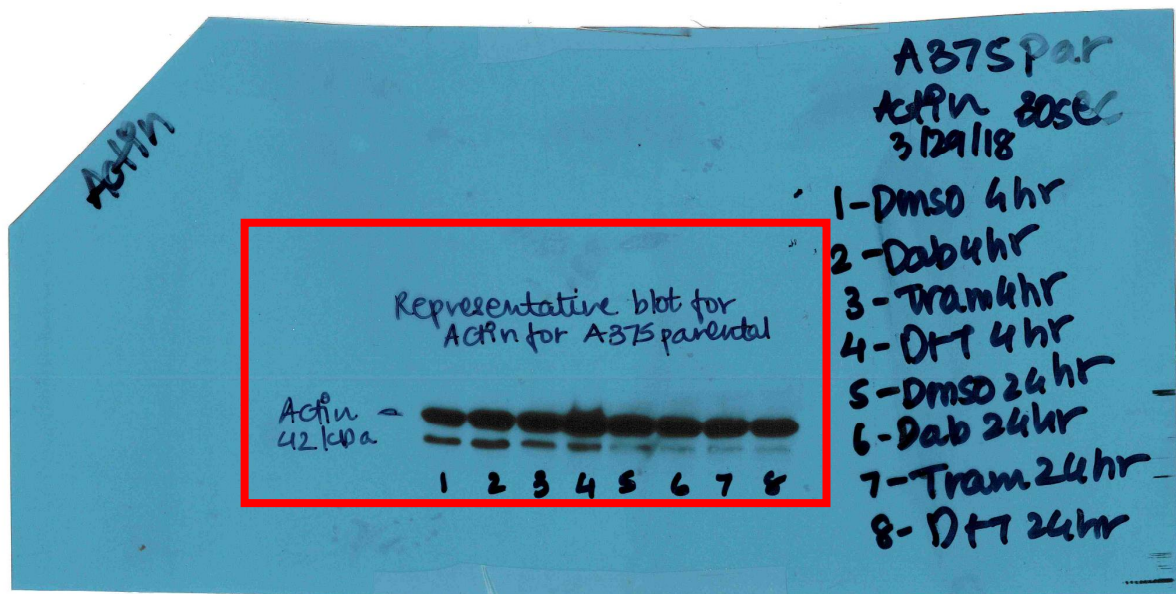

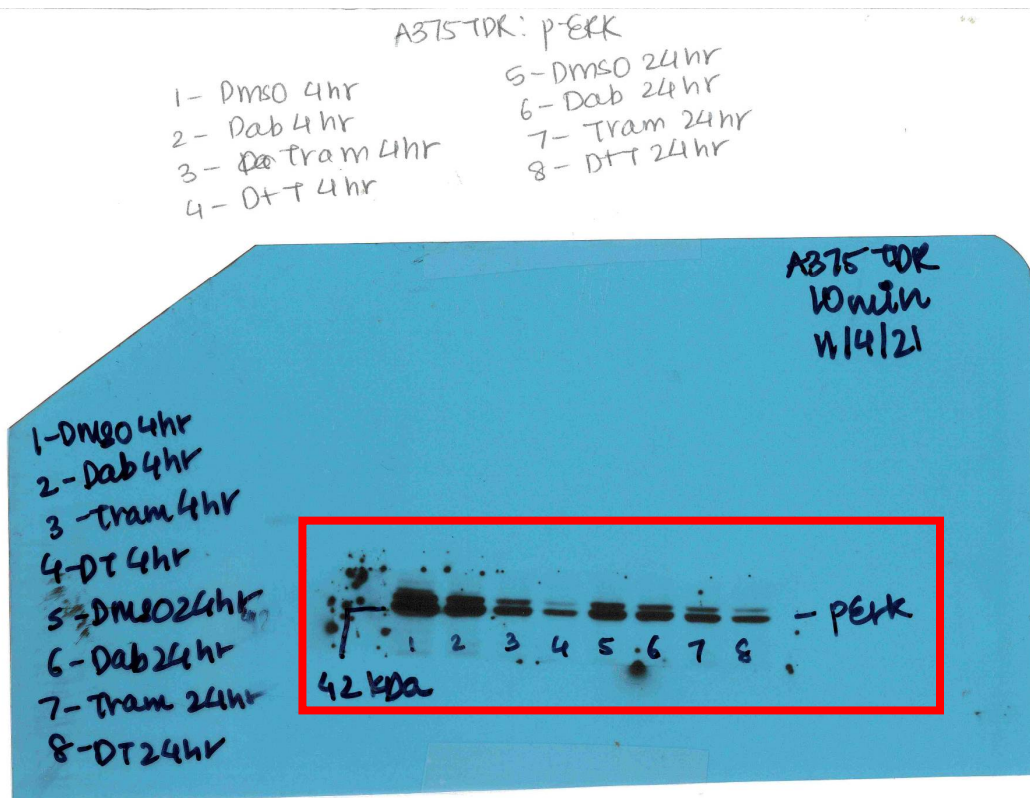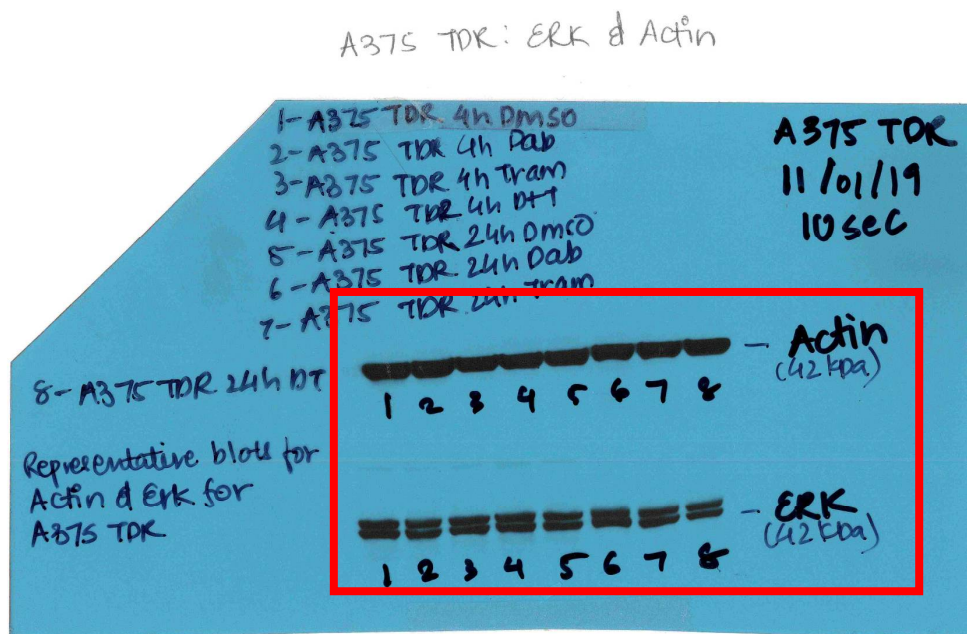

Figure S6. Whole blots for western blots in Figure 1D.



WM983B TDR: p-Erk

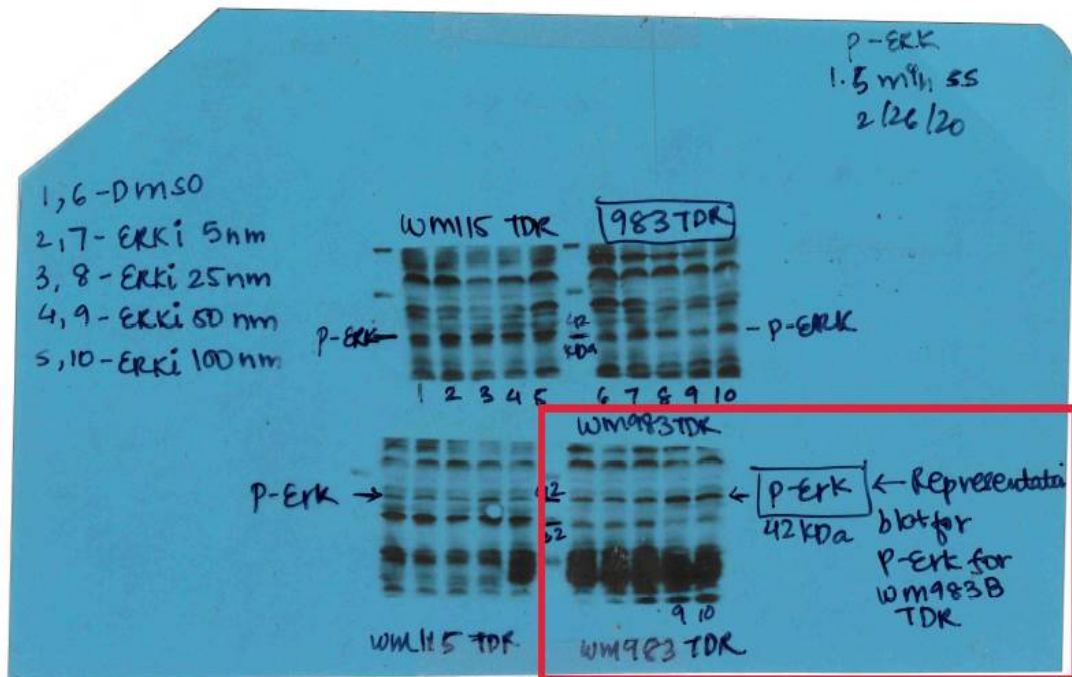

WM983B TDR: Erk & Actin

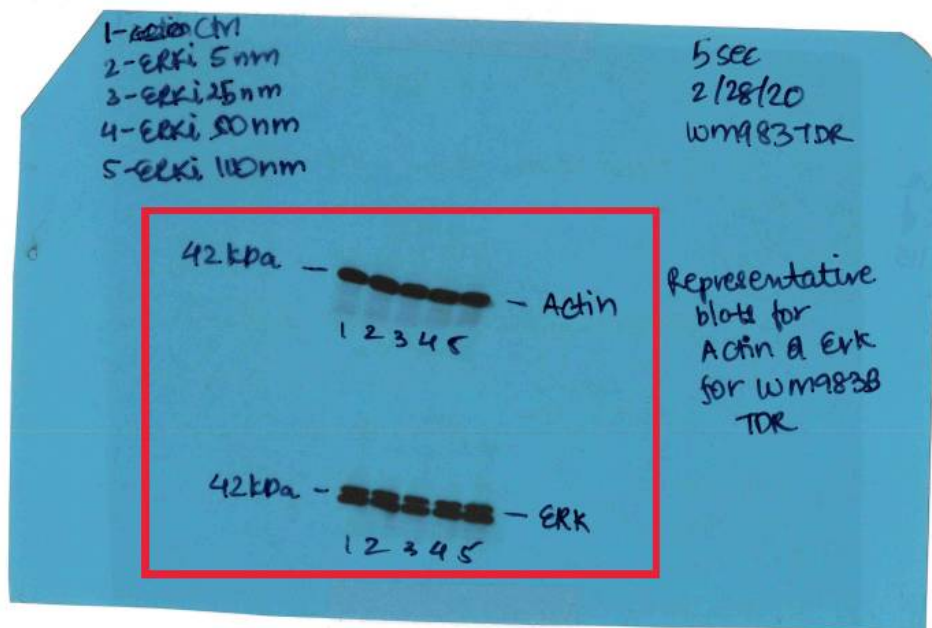



WM115 TDR: p-Erk

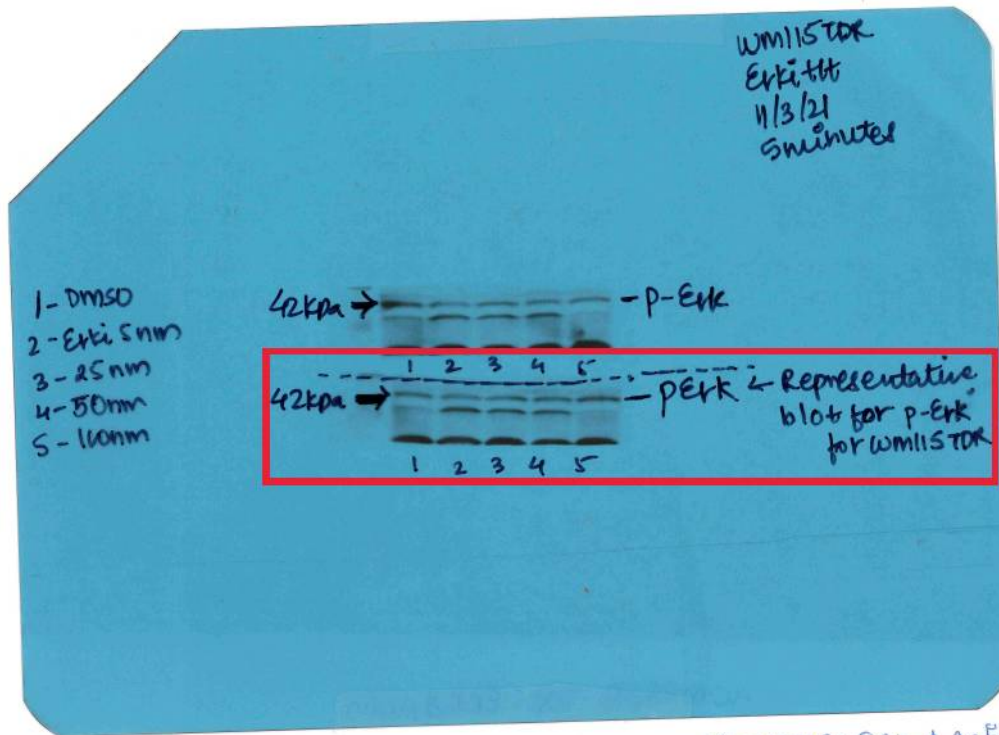

WM115 TDR: ERK & Actin

Representative blots for ERK & Actin for WM115 TDR

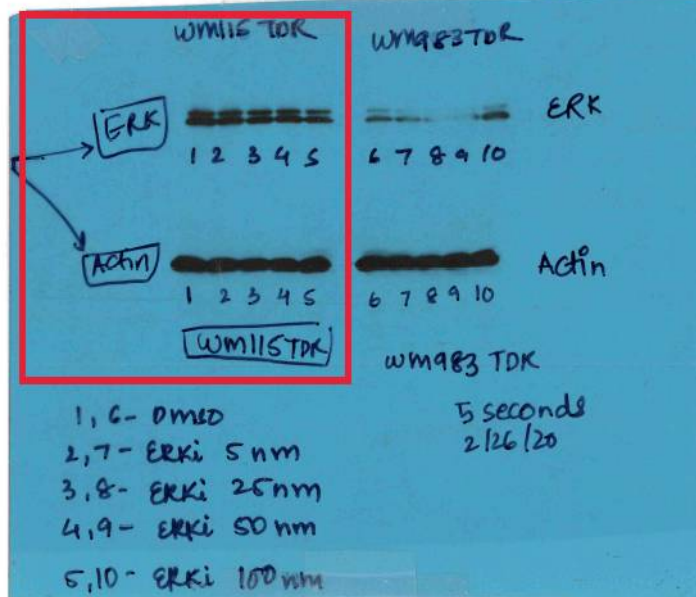

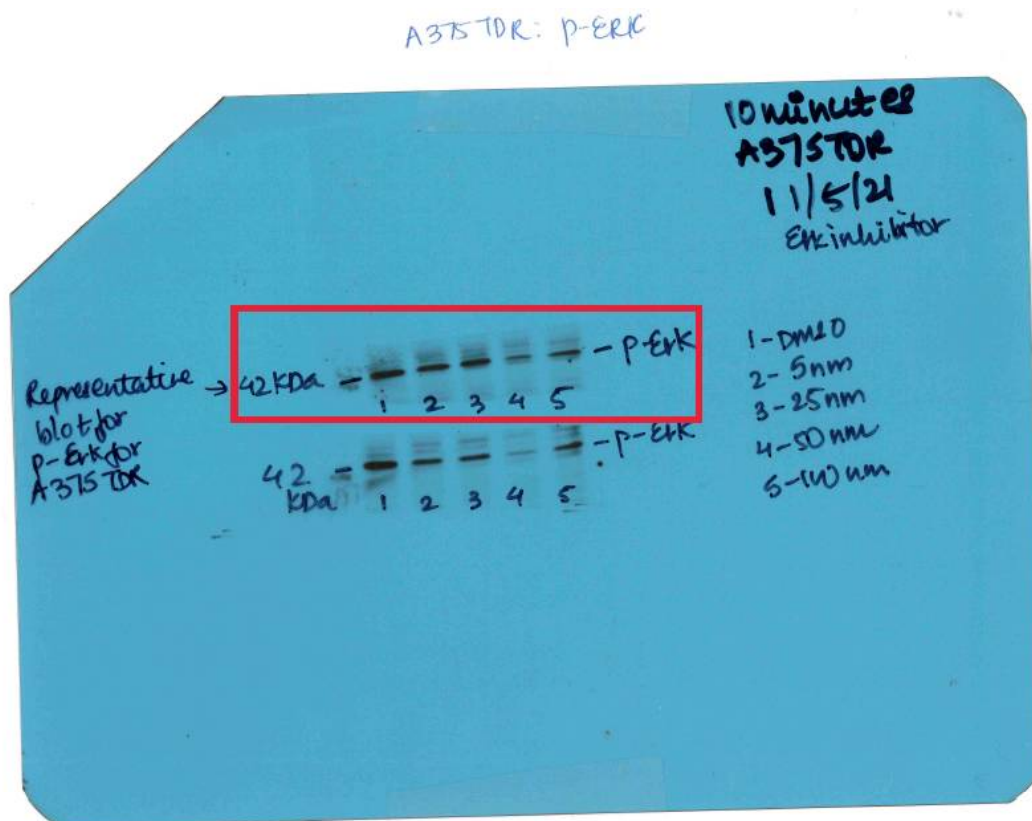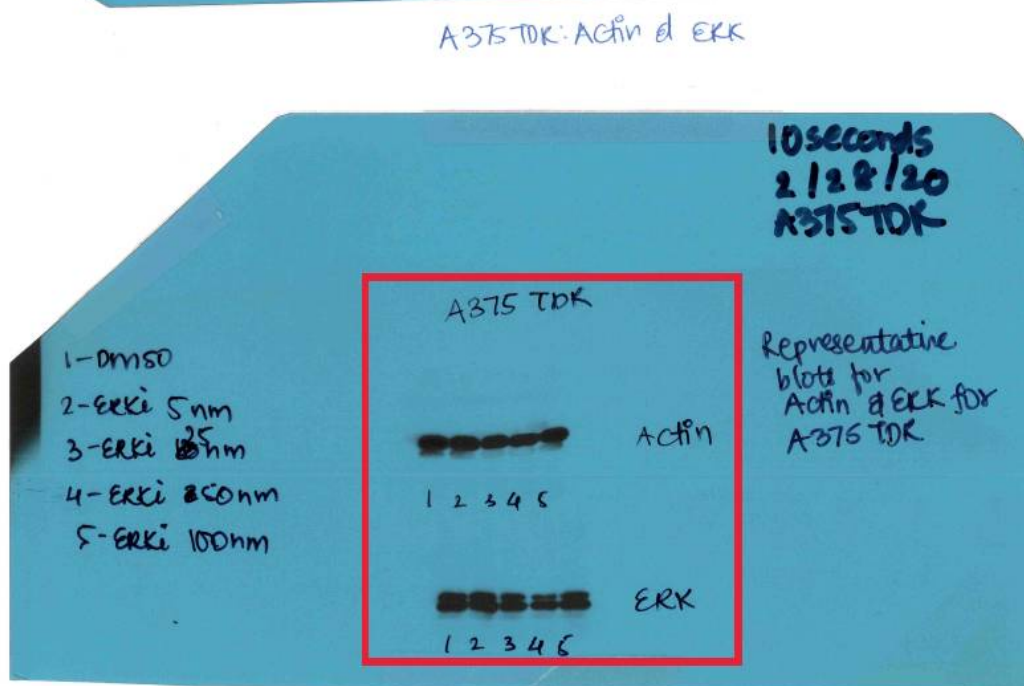

Figure S7. Whole blots for western blots in Figure 1E.

wm115: p-HER3(Y1289) & p-HER3(Y1197)  
 wm983: p-HER3(Y1289) & p-HER3(Y1197)

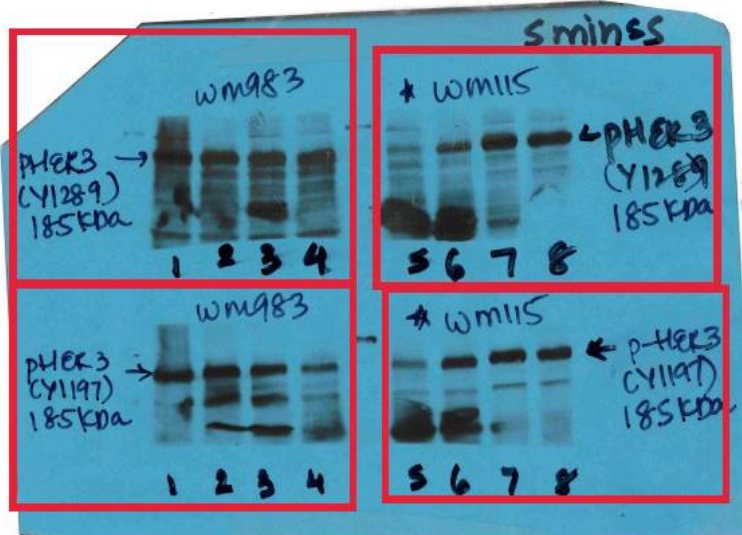

5- wm115 pal DMUO  
 6- wm115 pal DT  
 7- wm115 TOR DMUO  
 8- wm115 TOR DT

\* Representative blot for p-HER3(Y1289) & p-HER3(Y1197) for wm115; p-HER3(Y1289) for wm983  
 p-HER3(Y1197)

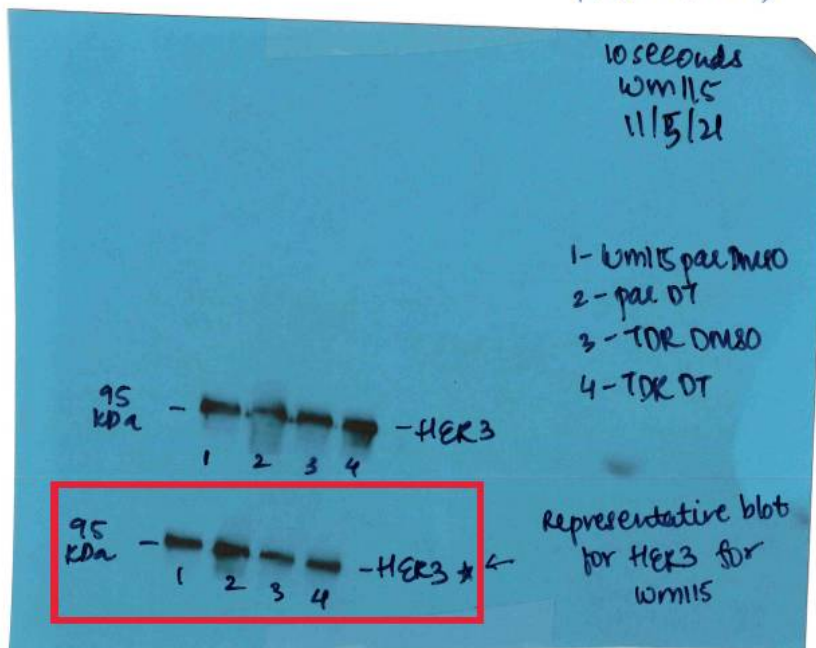

wm115: HER3

1- wm115 pal DMUO  
 2- pal DT  
 3- TOR DMUO  
 4- TOR DT

\* Representative blot for HER3 for wm115



WM115: p-EGFR & EGFR

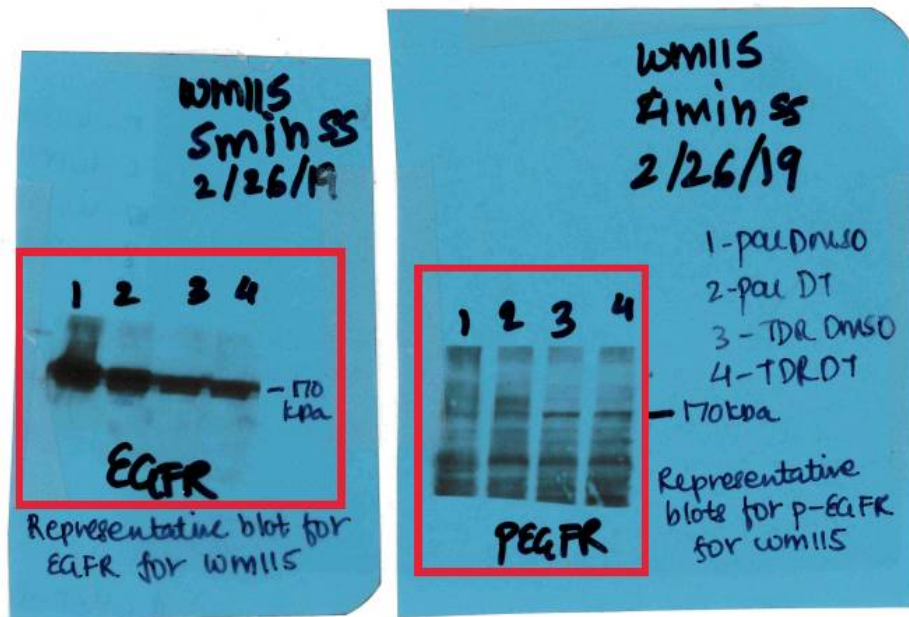

WM115: p-EGFR (Y1131) / p-IR (Y1146)

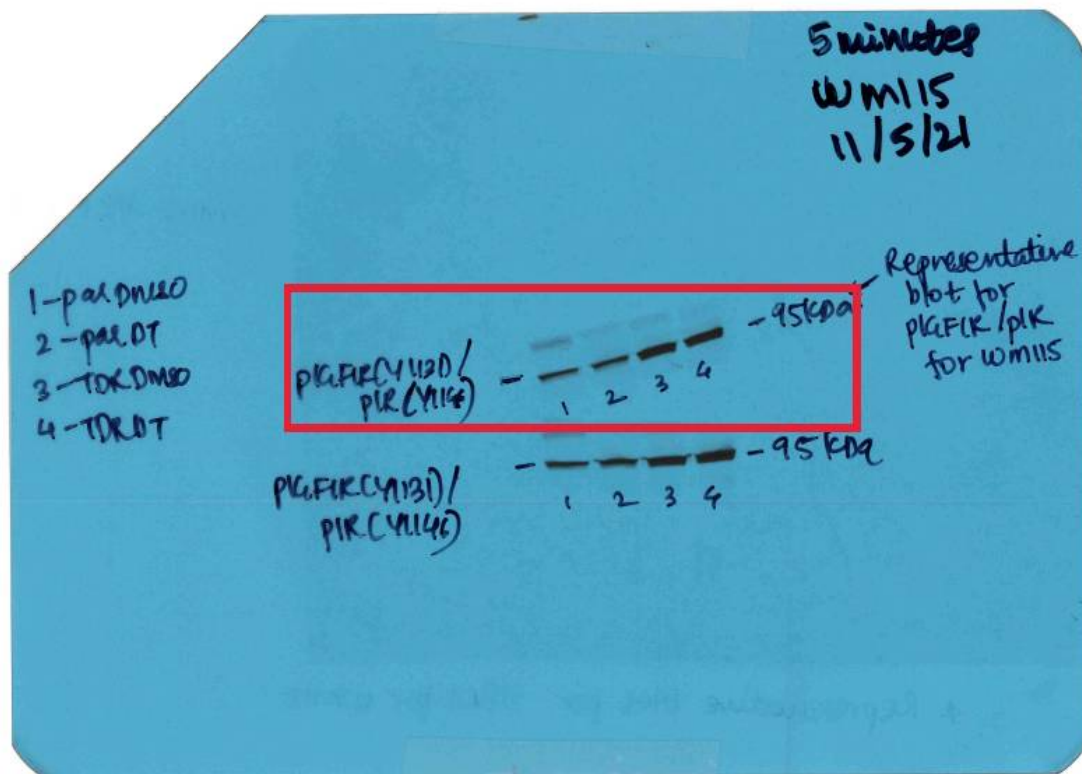

WM983B: Ax1; IGF1R

WM115: Ax1; IGF1R

8/24/19

5min exp

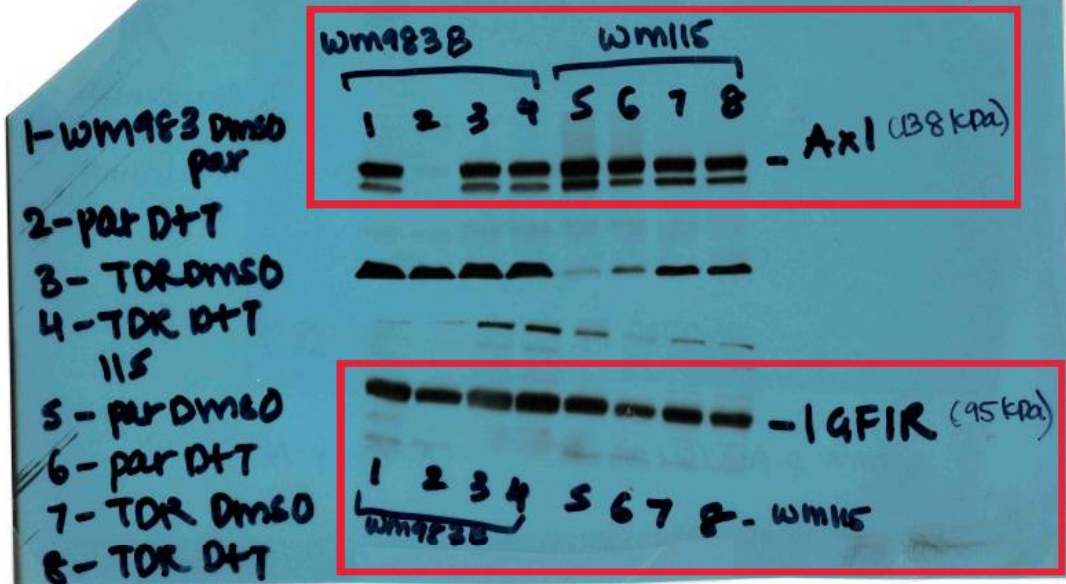

↑ Representative blot for WM983B (Ax1 & IGF1R) and WM115 (Ax1 & IGF1R)

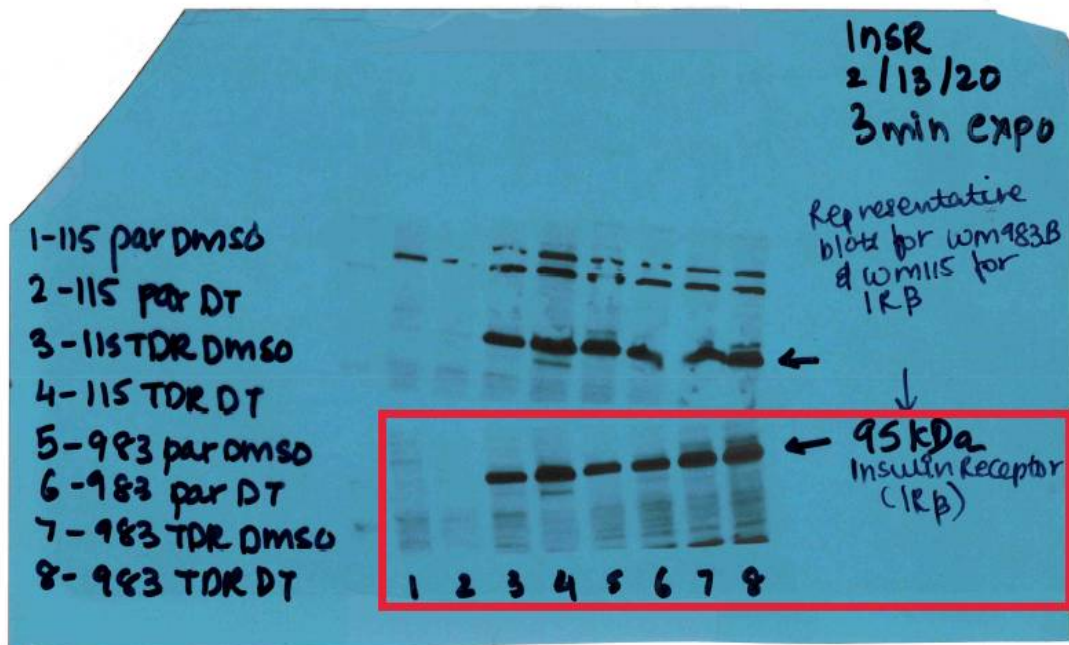

WM115: P-AXL (Y179)

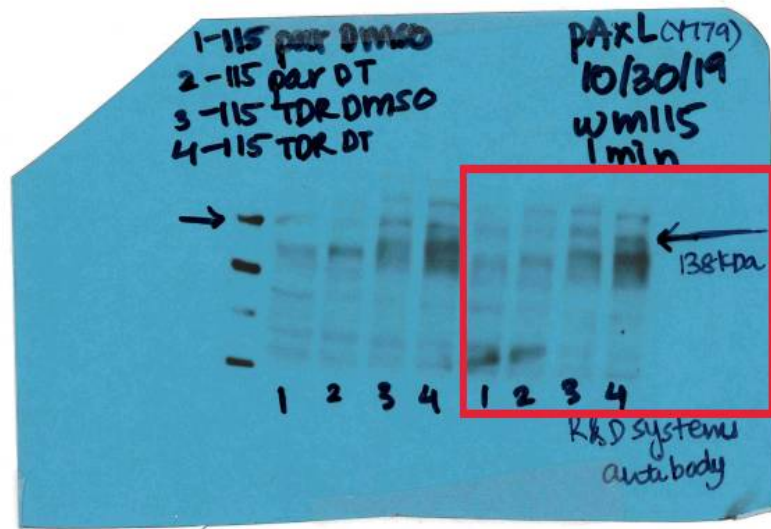

Representative blot for P-AXL (Y179) for WM115.

WM115: P-Akt (S473)

A375: P-Akt (S473)

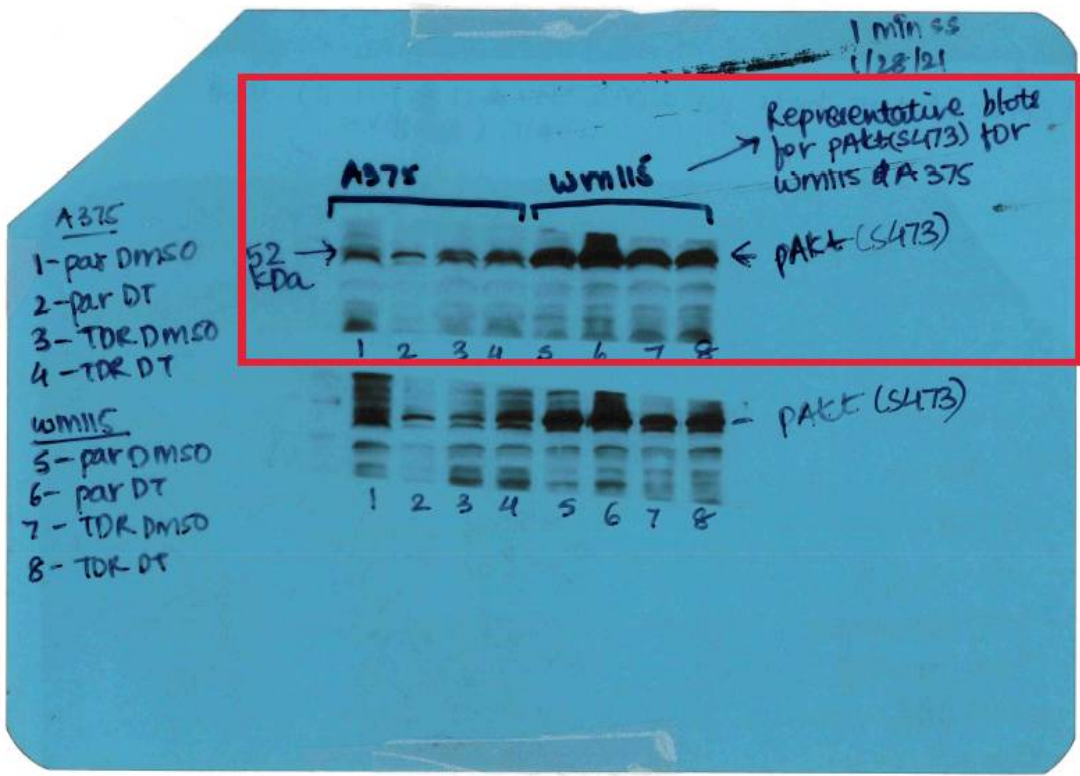



wm115: Akt ; A375: Akt

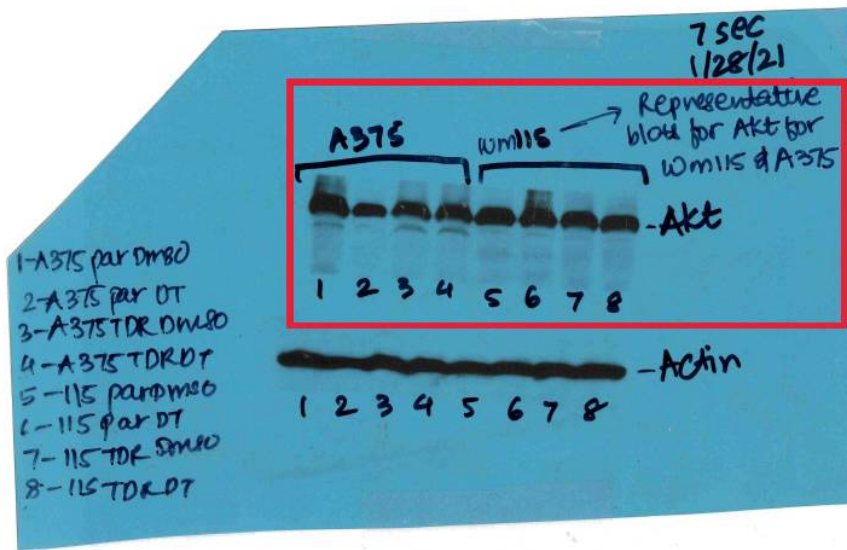

wm115: Actin

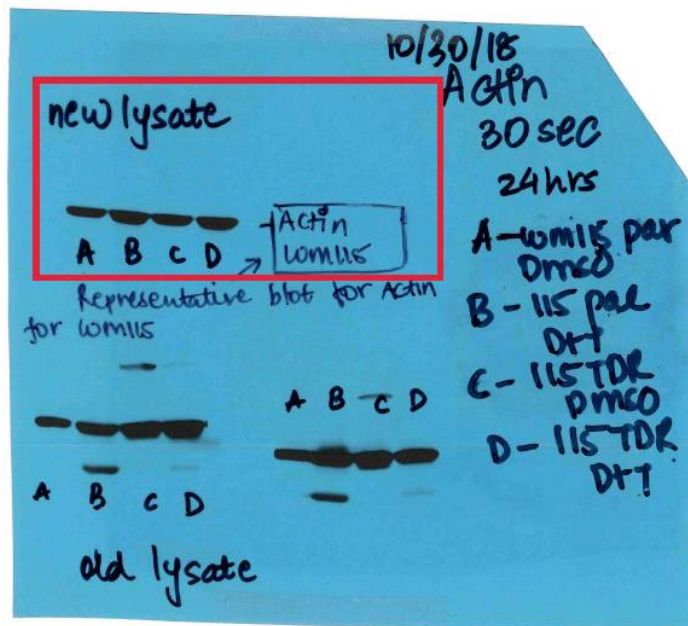

WM983B: HER3

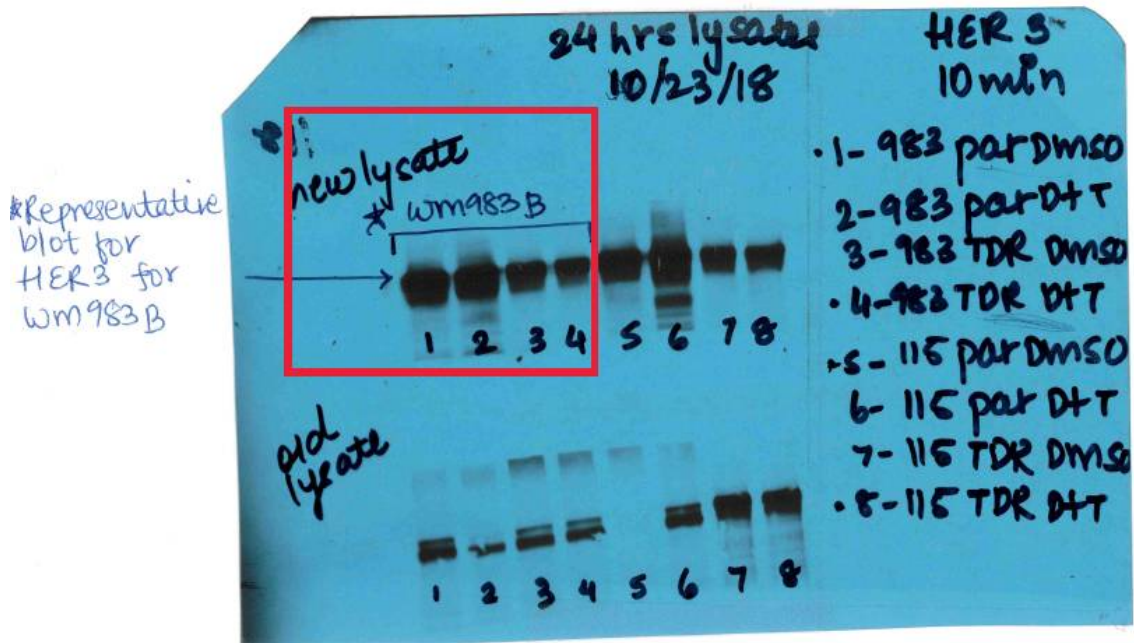

WM983B: p-EGFR & EGFR

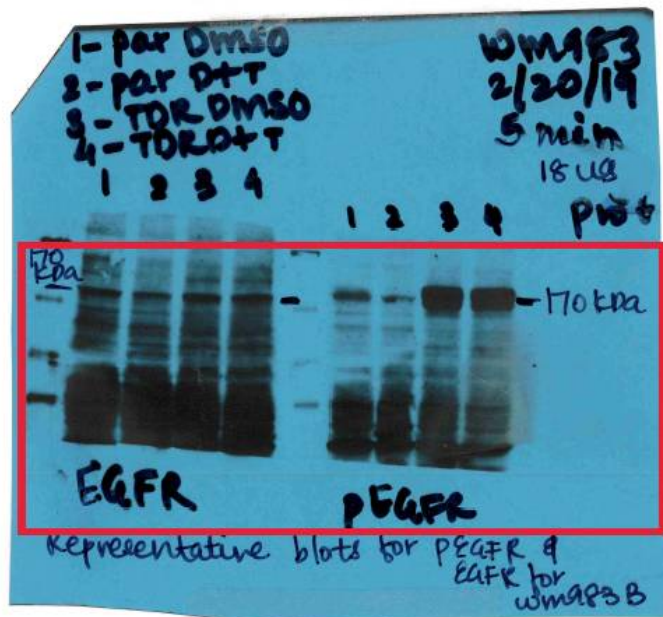



WM983B : p-AXL(Y779)

Representative blot for  
pAXL(Y779) for WM983B

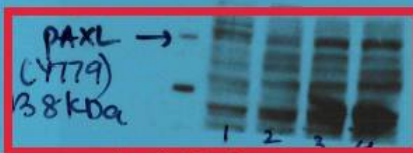

1- pal DMSO  
2- pal DT  
3- TOR DMSO  
4- TOR DT

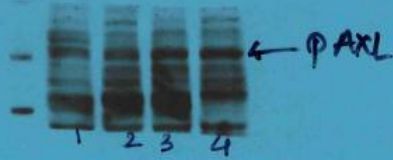

WM983  
11/7/19  
2.5 min  
R8 D systems alb

WM983B: p-Akt (S473)

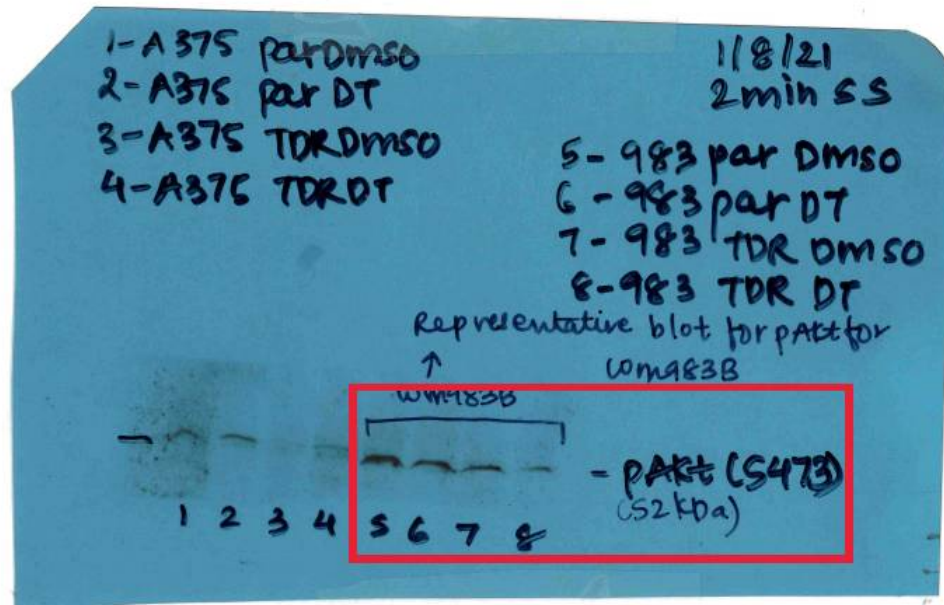

WM983B: Akt

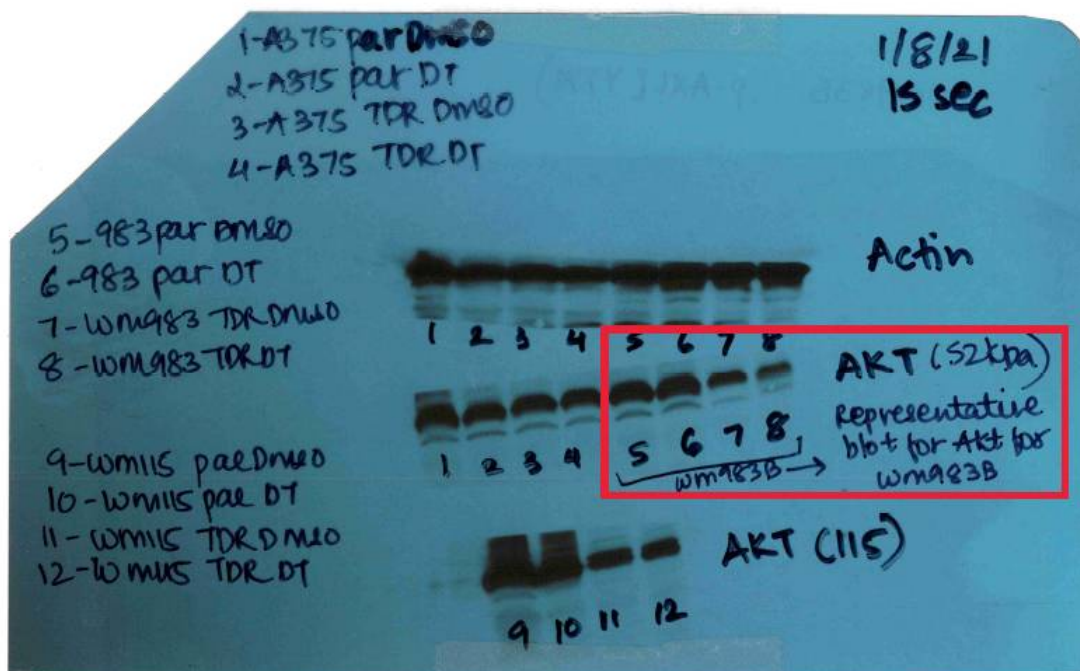

WM983B: Actin

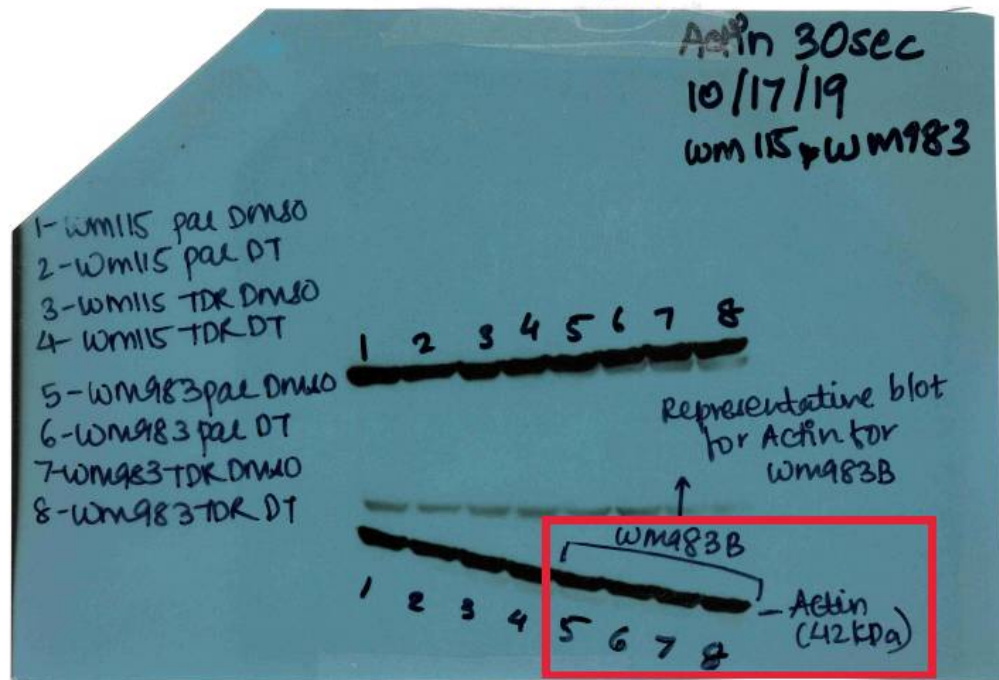

A375: p-HER3 (Y1289)

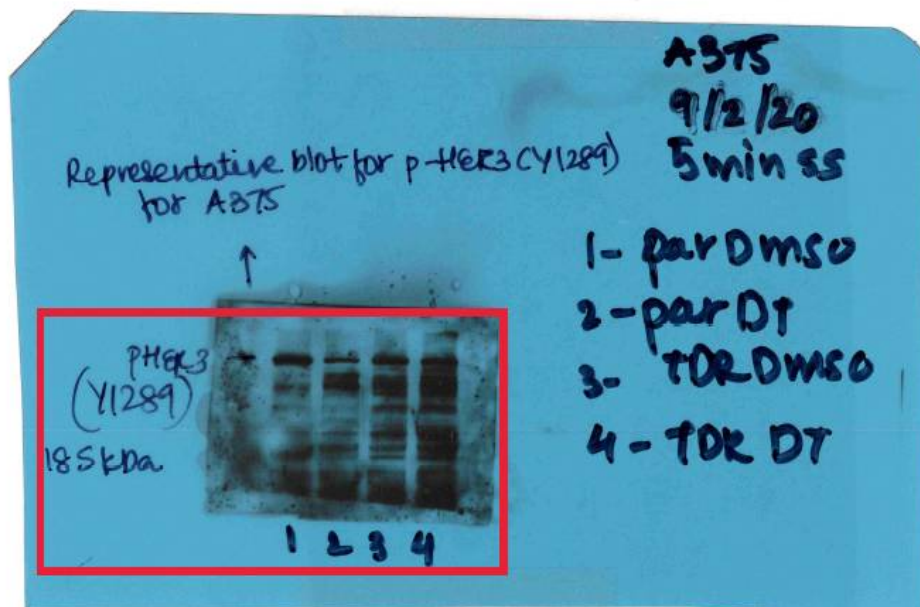

A375: p-HER3 (Y1197)

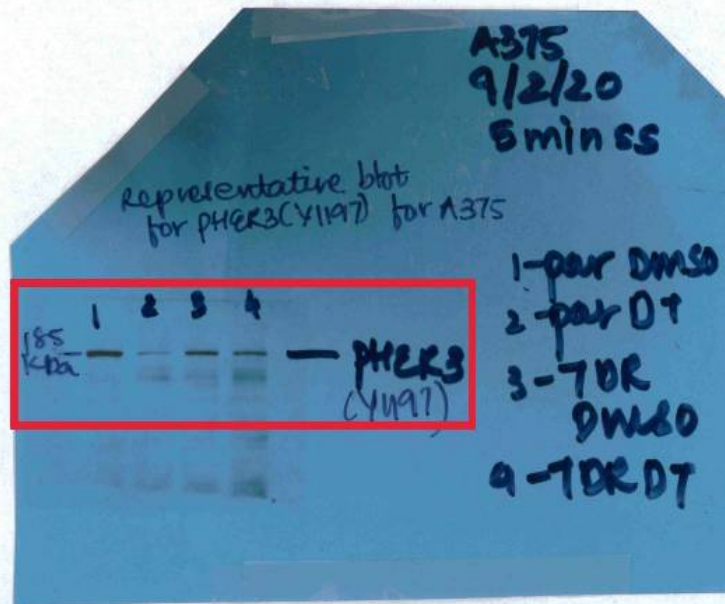

A375: HER3

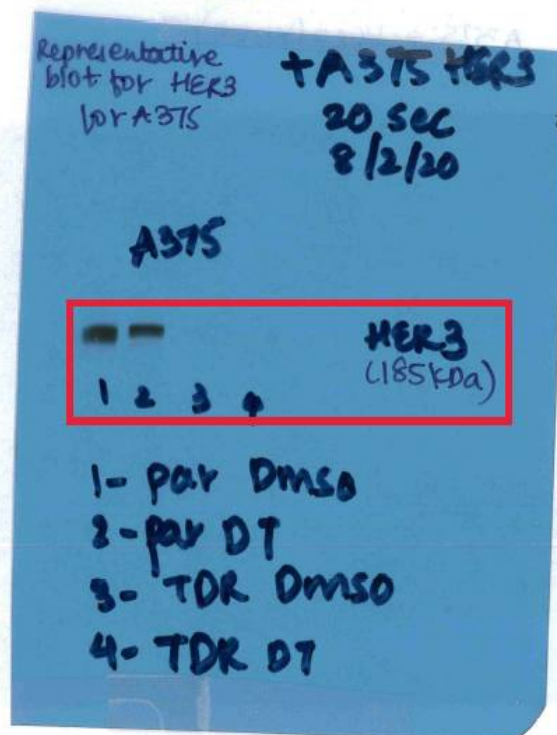



# A375pEGFR

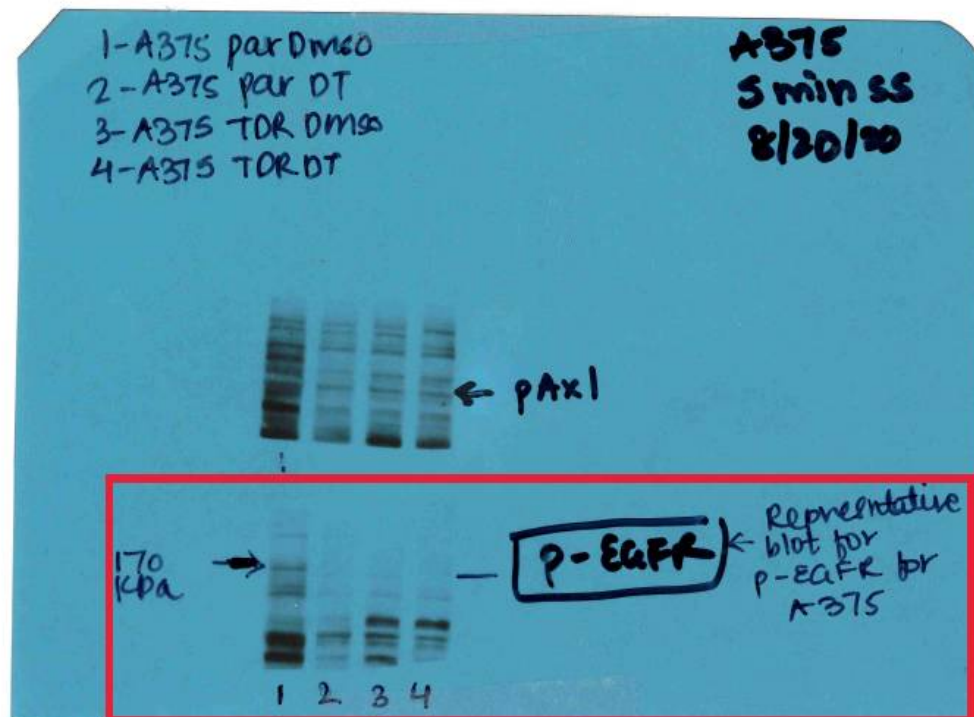

## A375: EGFR & IRP

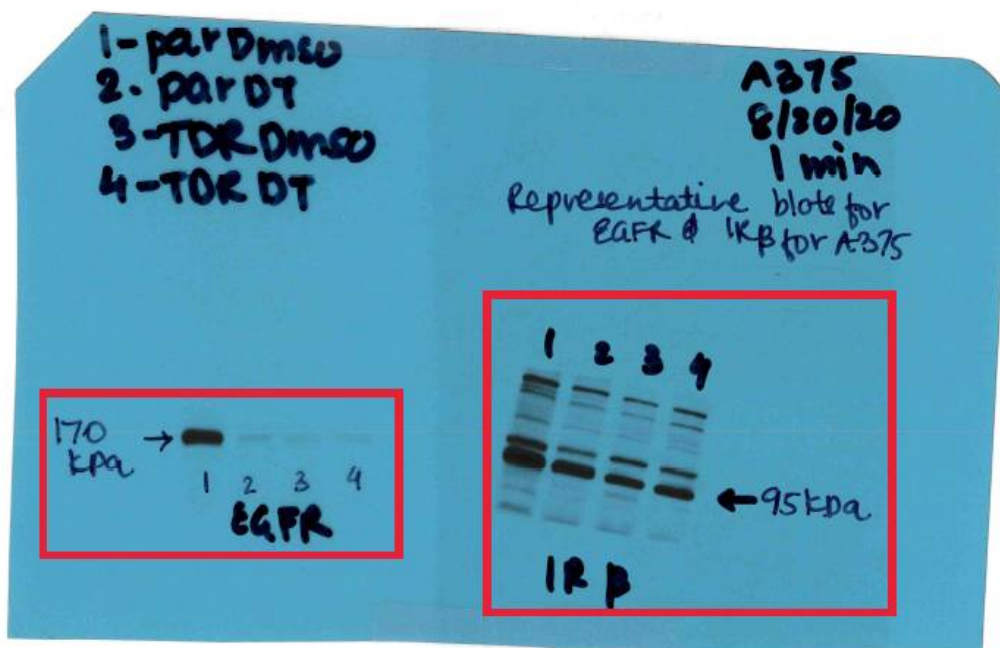

A375 and WM983B p-IGF1R(Y1131) / p-IR(Y1146)

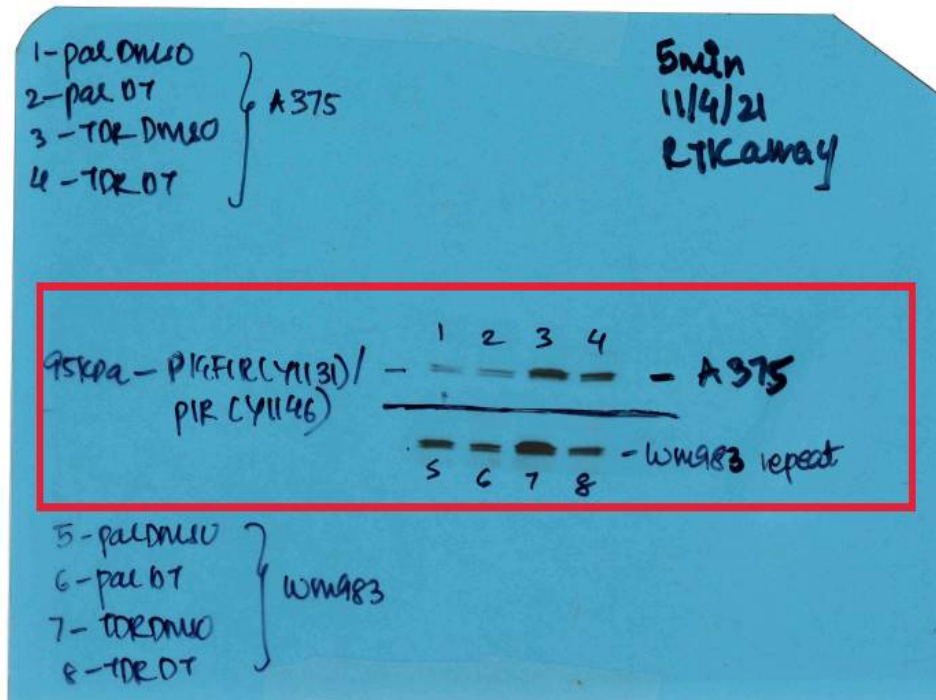

A375:IGF1R

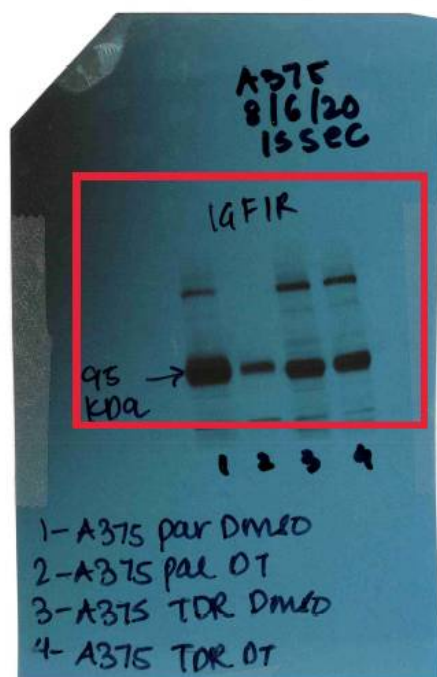

A375: pAXL

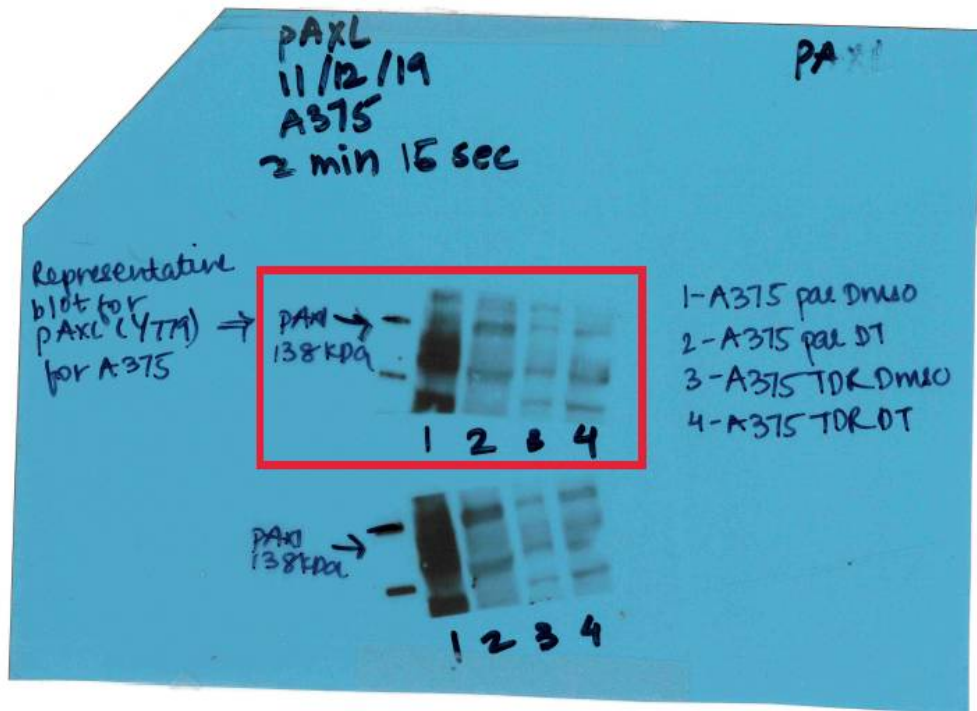

A375: AXL & Actin

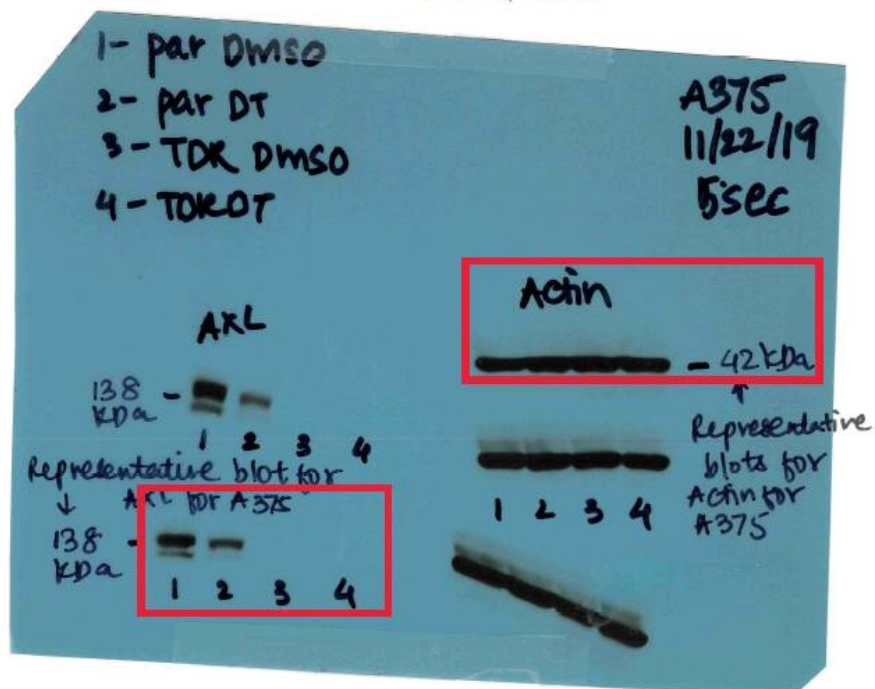

Figure S8. Whole blots for western blots in Figure 2C.

Figure 4D

WM115 TOR: p-I $\alpha$ FIK(Y1131) / PIR(Y1146)

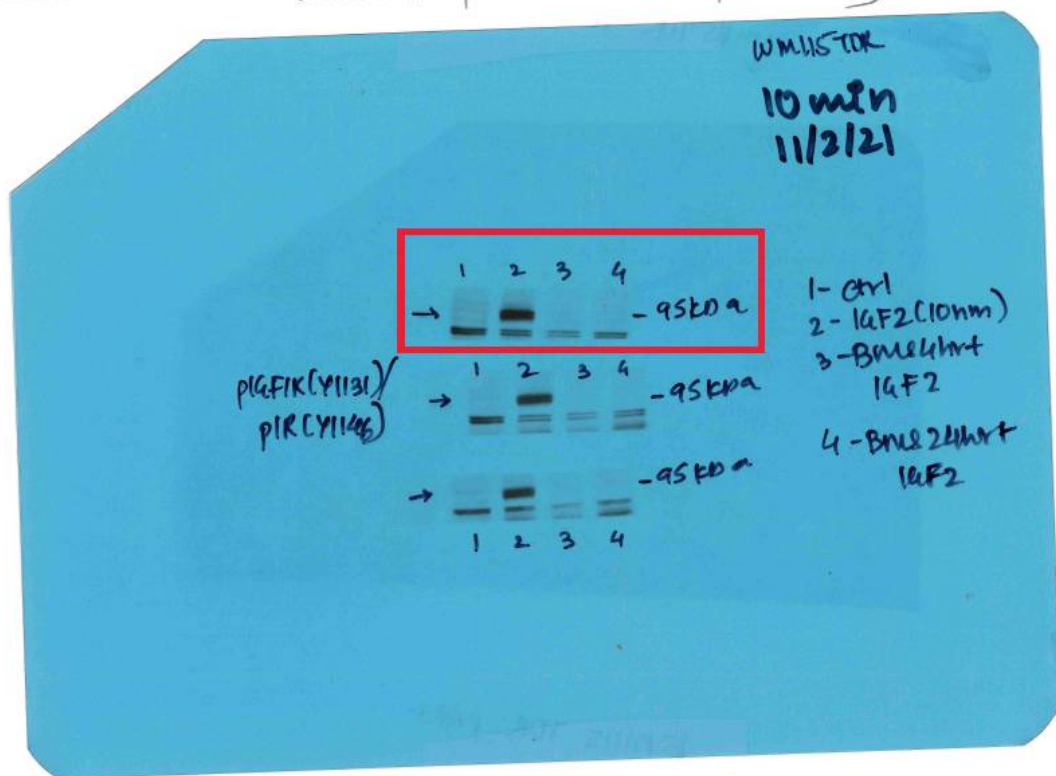

WM115 TOR: I $\alpha$ FIK

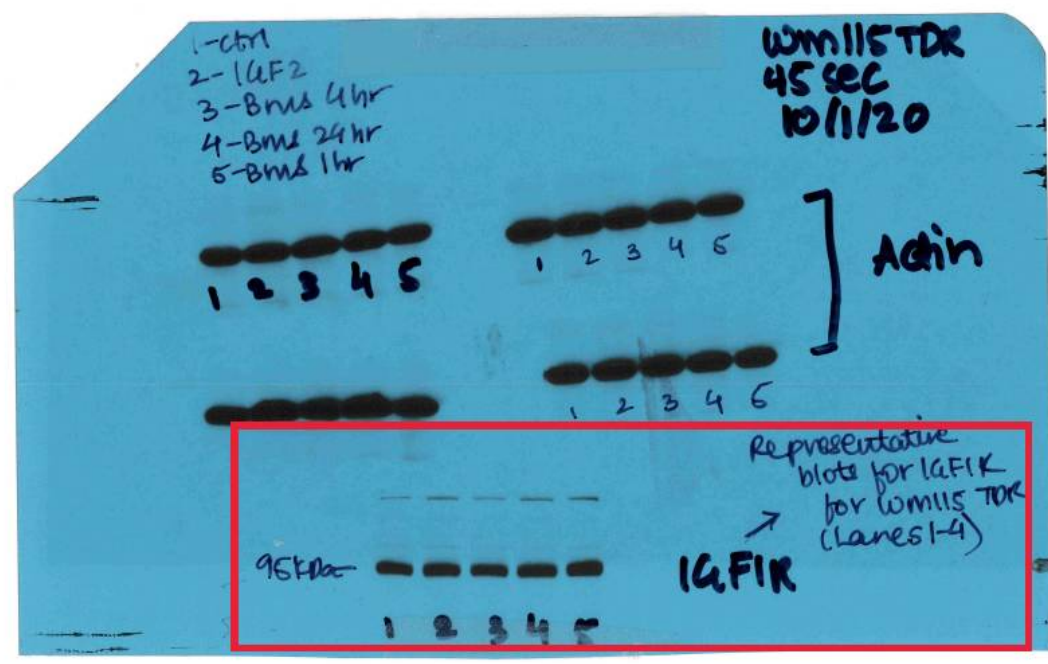



WM115 TDR: IR

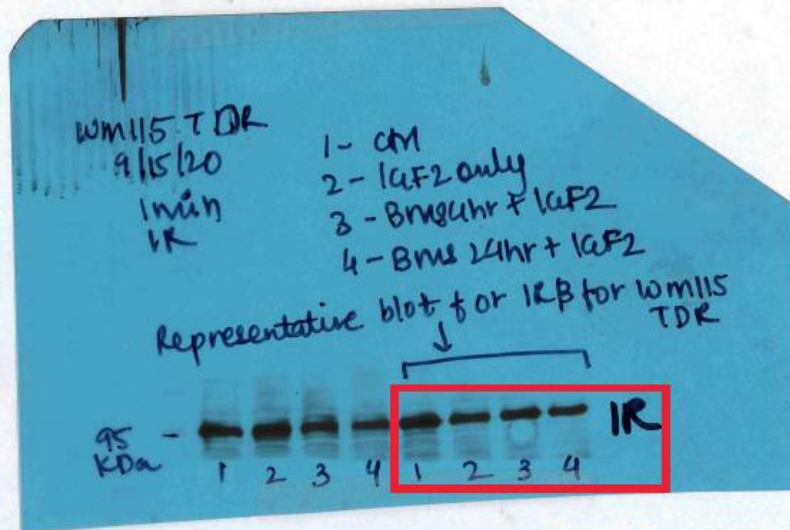

WM115 TDR: PAKT

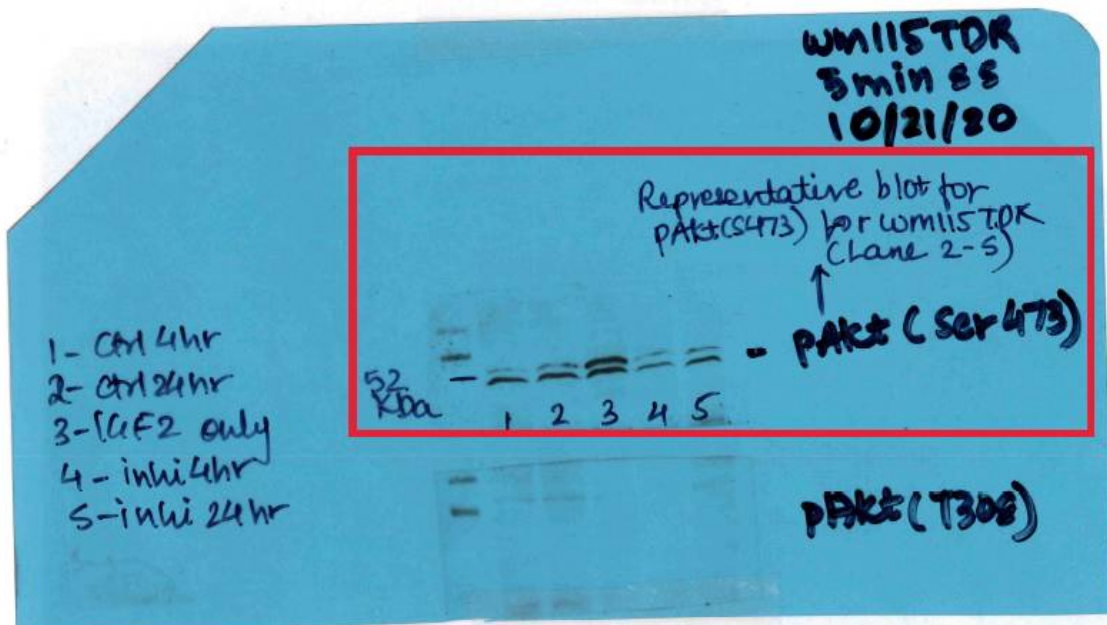

WM115 TDR: ~~phospho~~ Akt

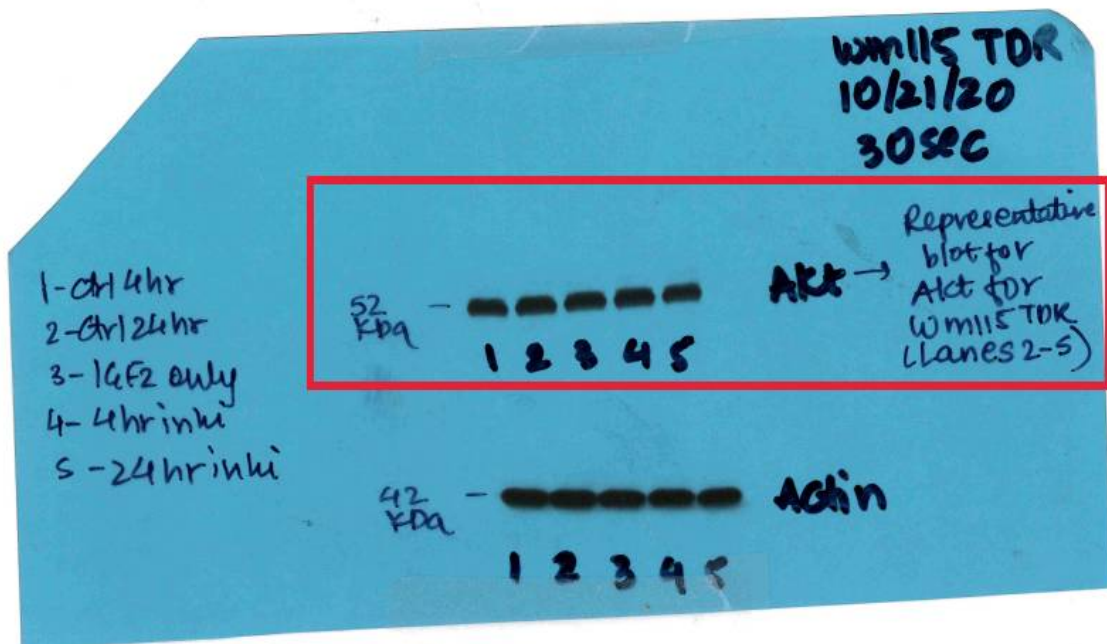

WM115 TDR: p-Erk

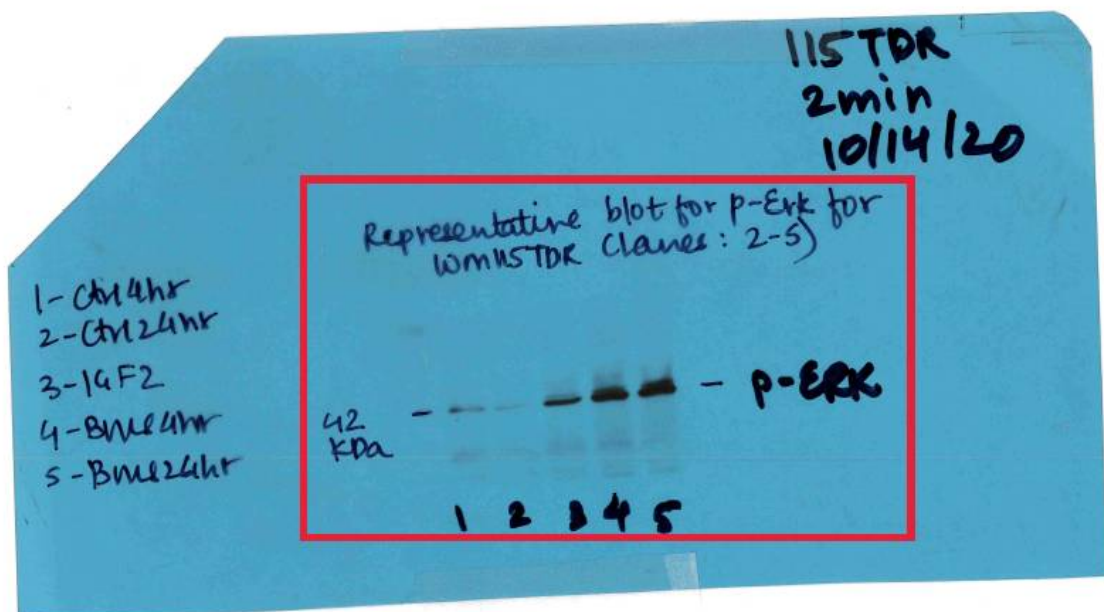

Wm115-TDK: ERK

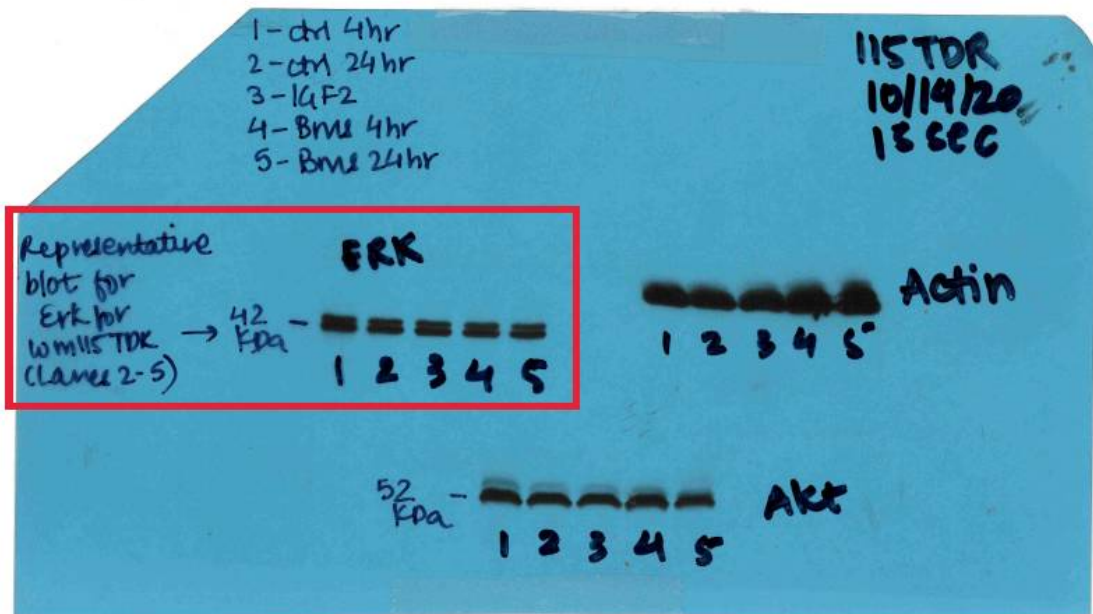

Wm115-TDK: Actin

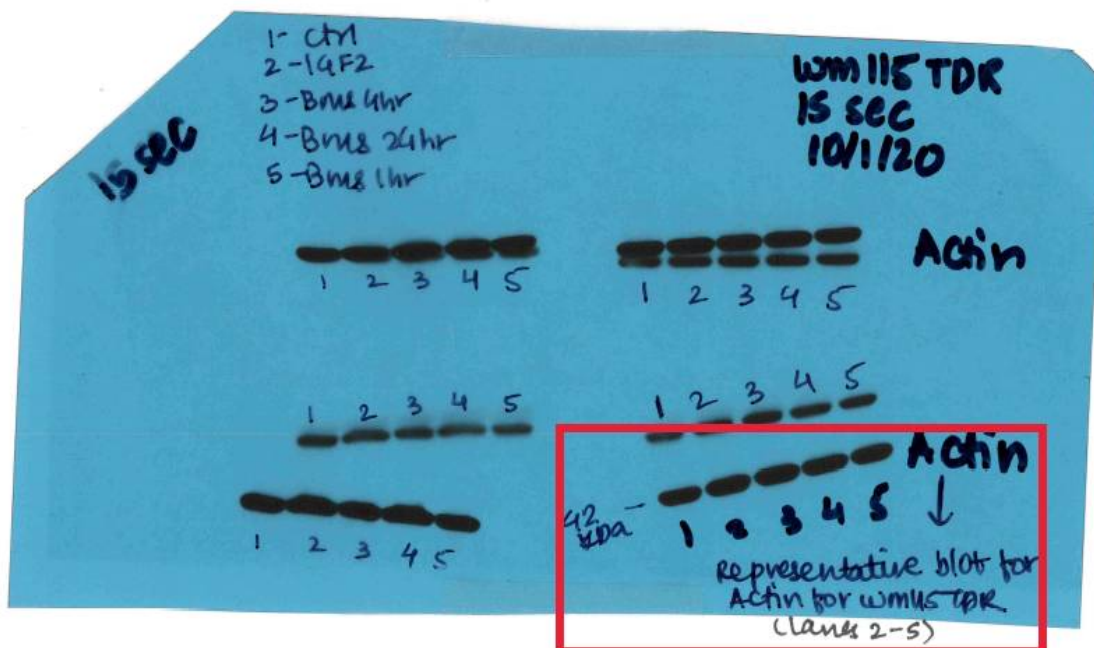



WM983TDR: pIGFIR(Y1131) /  
PIR(Y1146)

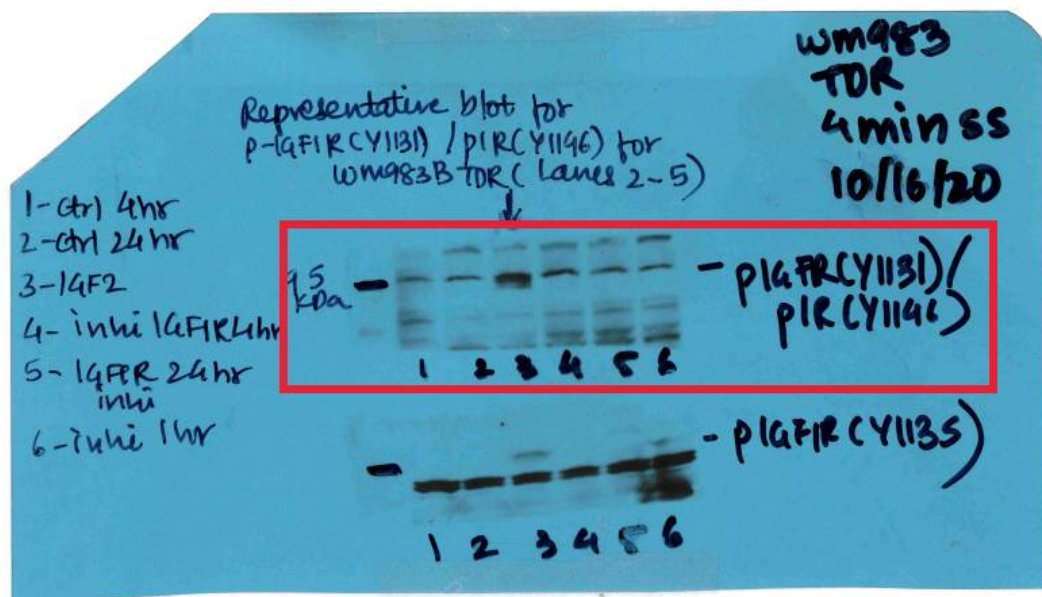

WM983B TDR: IGFIR & IR

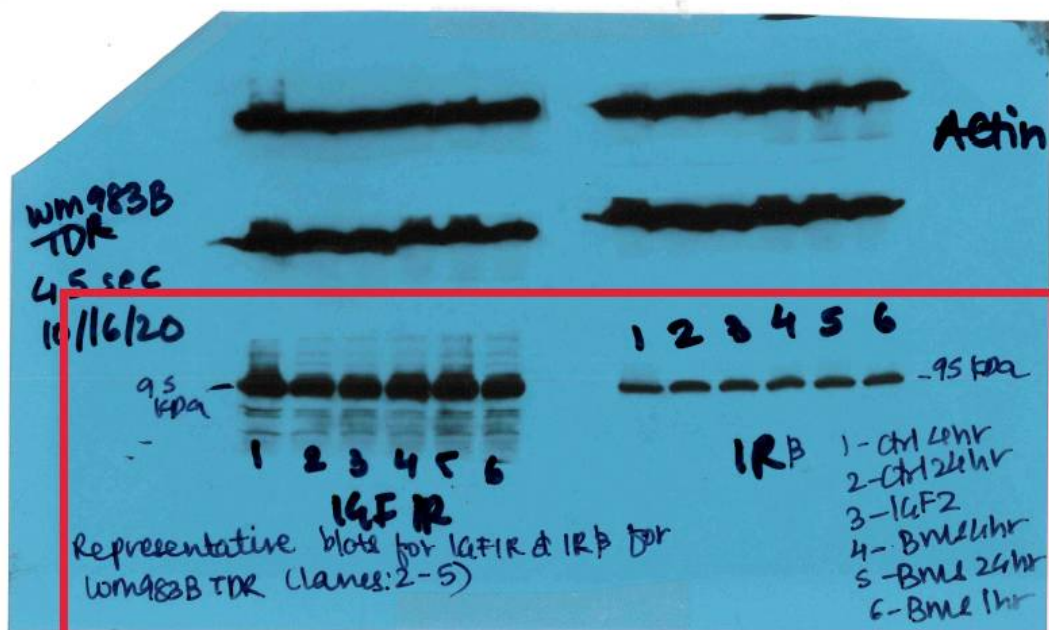

WM983TDR: p-Akt

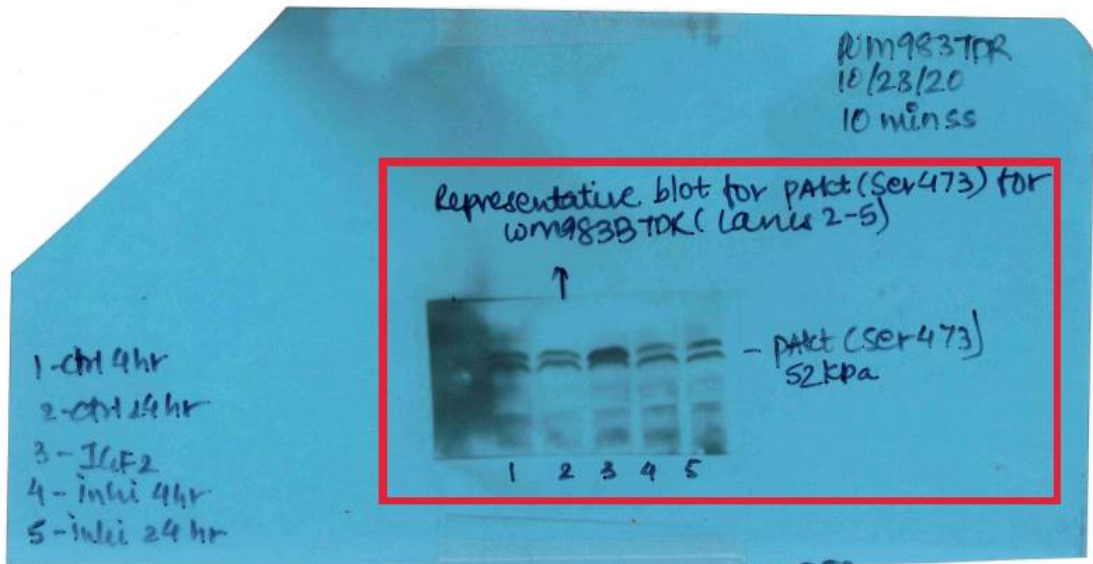

WM983B TDR: AKT

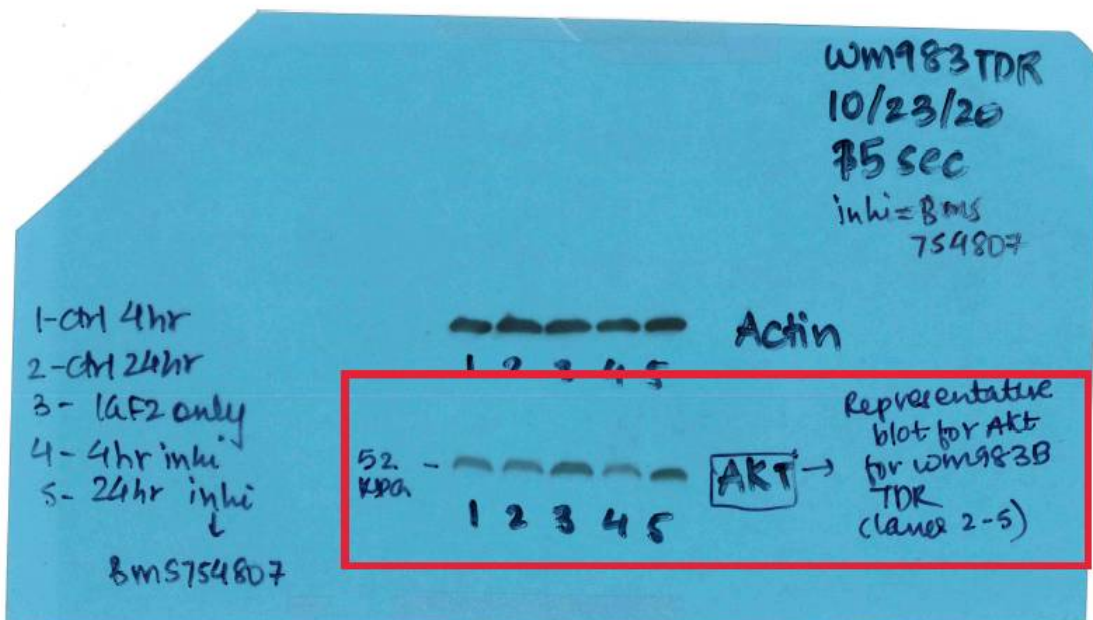

WM983B TOR: P-ERK

WM983B TOR  
10 min  
11/2/21

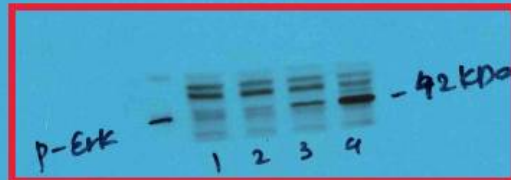

1-ctrl  
2-IGF2 (10nm)  
3-BMS4hr + IGF2  
4-BMS24hr + IGF2

WM983B TOR: ERK & Actin

Representative blots for Actin & ERK  
for WM983B TOR

983B TOR  
5sec  
10/30/20

1=ctrl 24hr  
2-IGF2  
3-Inhi 4hr  
4-Inhi 24hr  
BMS-754807

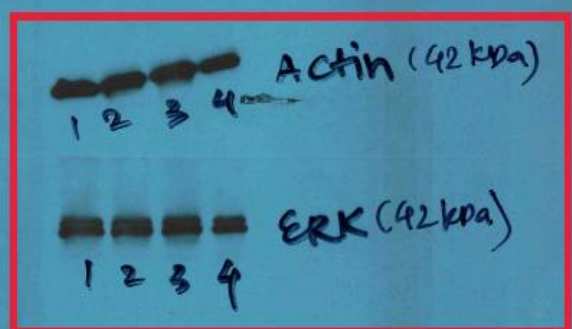



A375TDR: pIGFIR(Y1131)/  
PIR(Y1146)

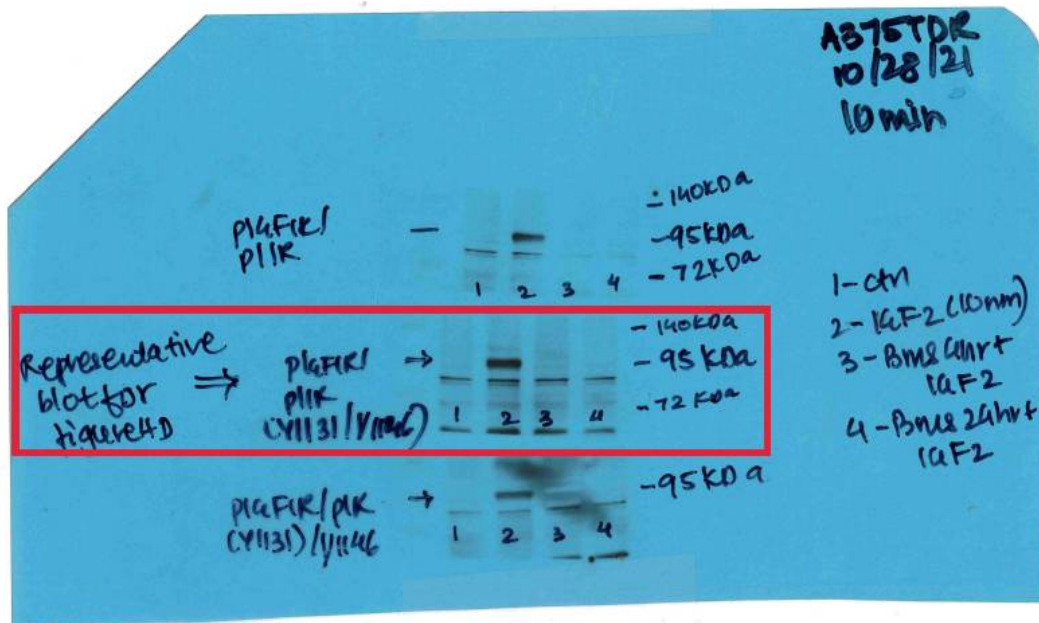

A375TDR: IGFIR

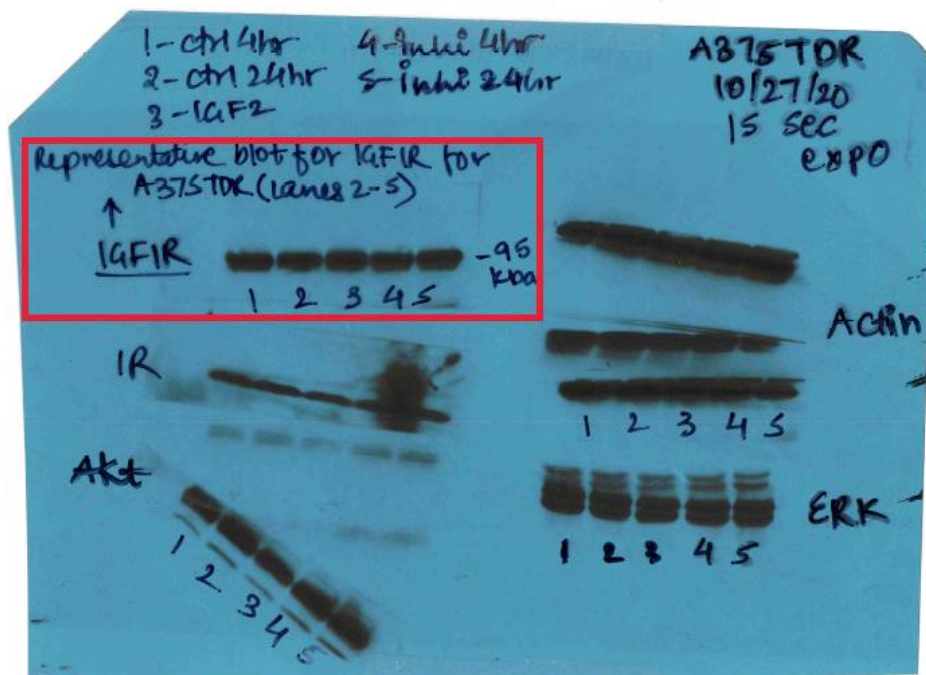

A375TOR: IR

1- Ctrl  
2- IGF2 only  
3- Bms 4hr + IGF2  
4- Bms 24hr + IGF2

Bms

95 kDa 1 2 3 4

Representative blot for IR for A375TOR

95 kDa 1 2 3 4

A375TOR  
1min.  
Insulin  
receptor

A375TOR: p-Akt

A375TOR  
10/27/20  
1min ss

PAK1-  
S473

1 2 3 4 5

Representative blot for PAK1 (S473) for A375TOR (lanes 2-5)

PAK1-  
S473

1 2 3 4 5

52 kDa

PERK

1 2 3 4 5

1- 4hr Ctrl  
2- 24hr Ctrl  
3- IGF2  
4- 4hr insu  
5- 24hr insu



A375 TOR: ERK

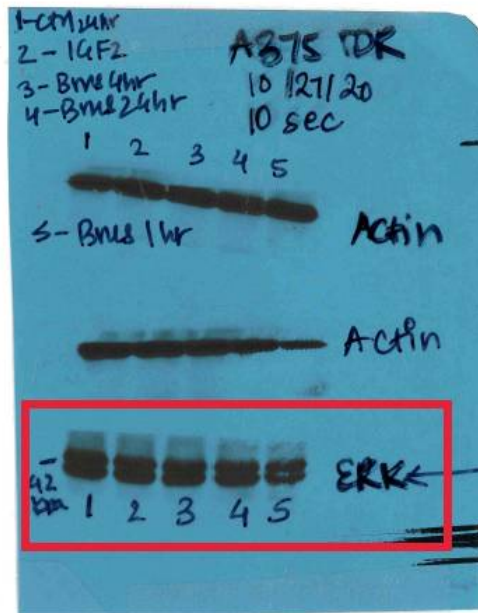

Representative blot for ERK for A375 TOR (lanes 1-4)

A375 TOR: Akt & Actin

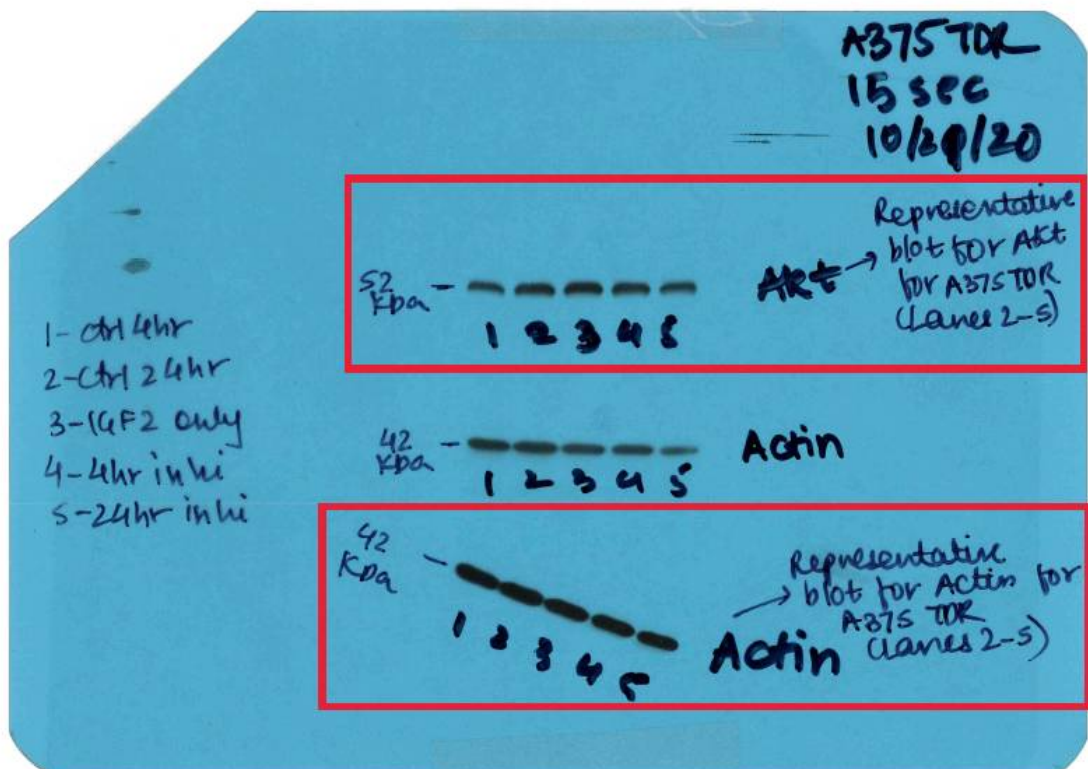

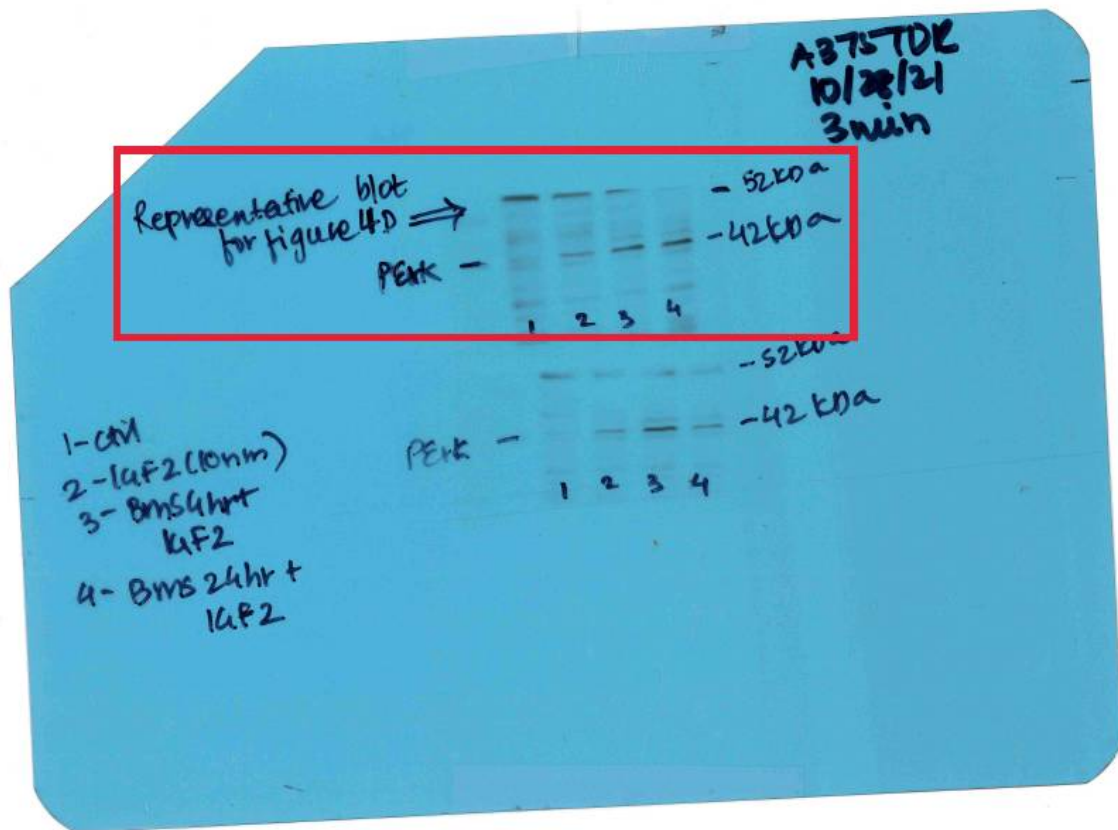

Figure S9. Whole blots for western blots in Figure 4D.

WM115 TDR: IGF1R & IR

Representative blot for IGF1R & IR in WM115 TDR

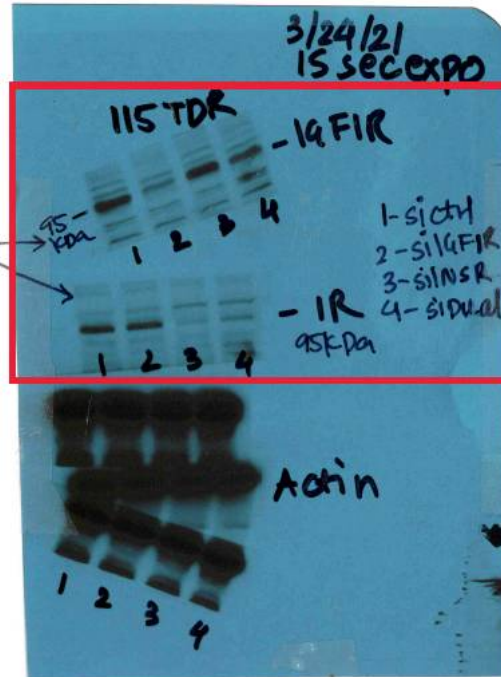

WM115 TDR: Actin; WM983B TDR: Actin, IGF1R; A375 TDR: IR, Actin

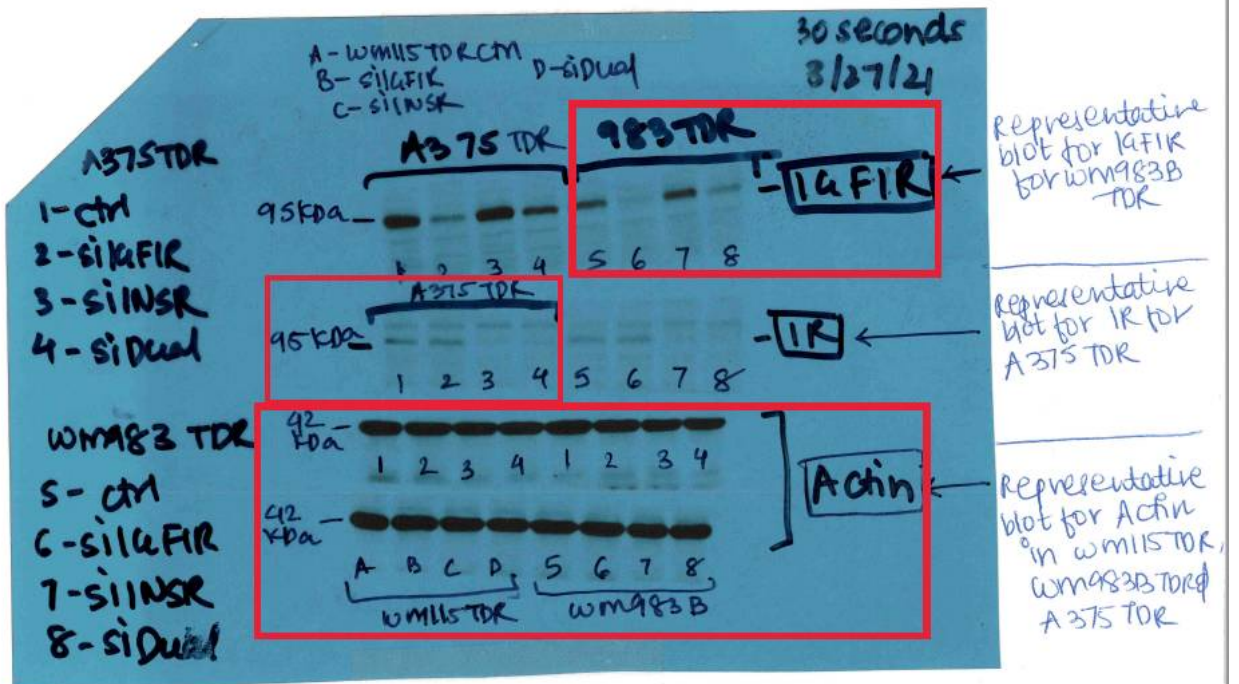



Wm9838 TDR: IGF1R & IR

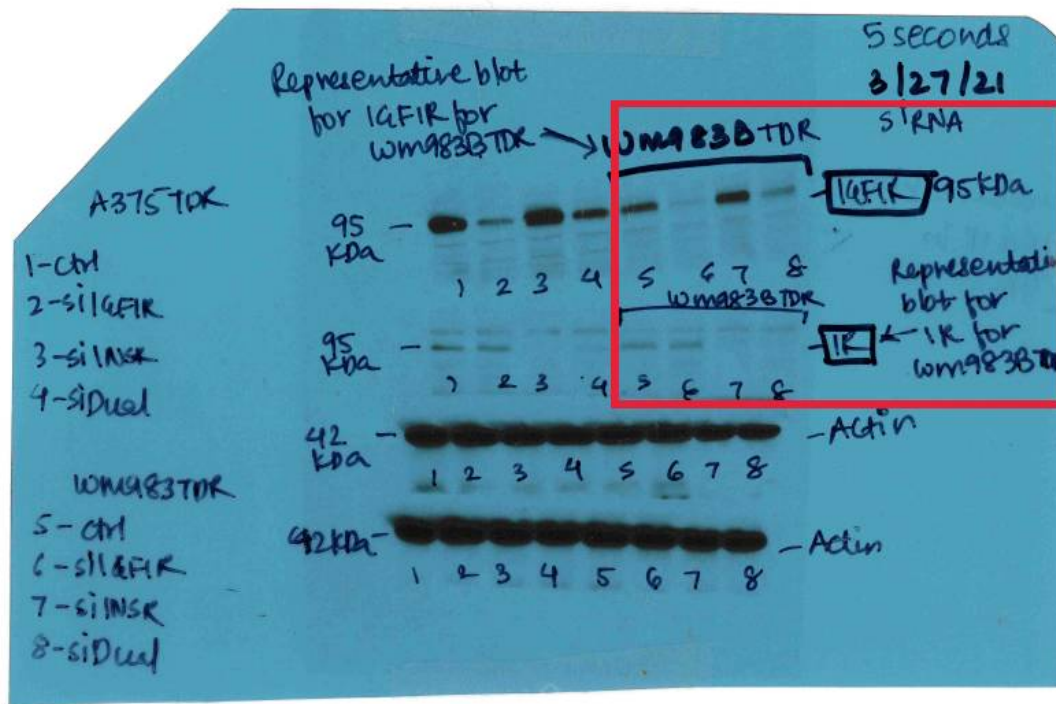

A375 TDR: IGF1R & IR

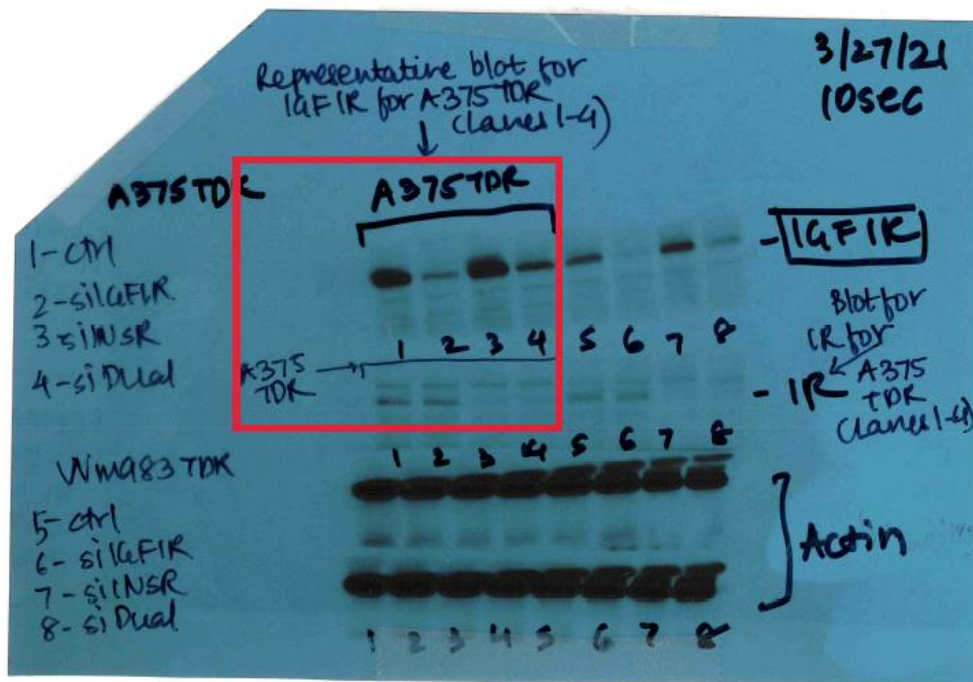

Figure S10. Whole blots for western blots in Figure 5A.



Figure 6  
Wm115 TDR tumor lysate: p-IaFIR / p-IK

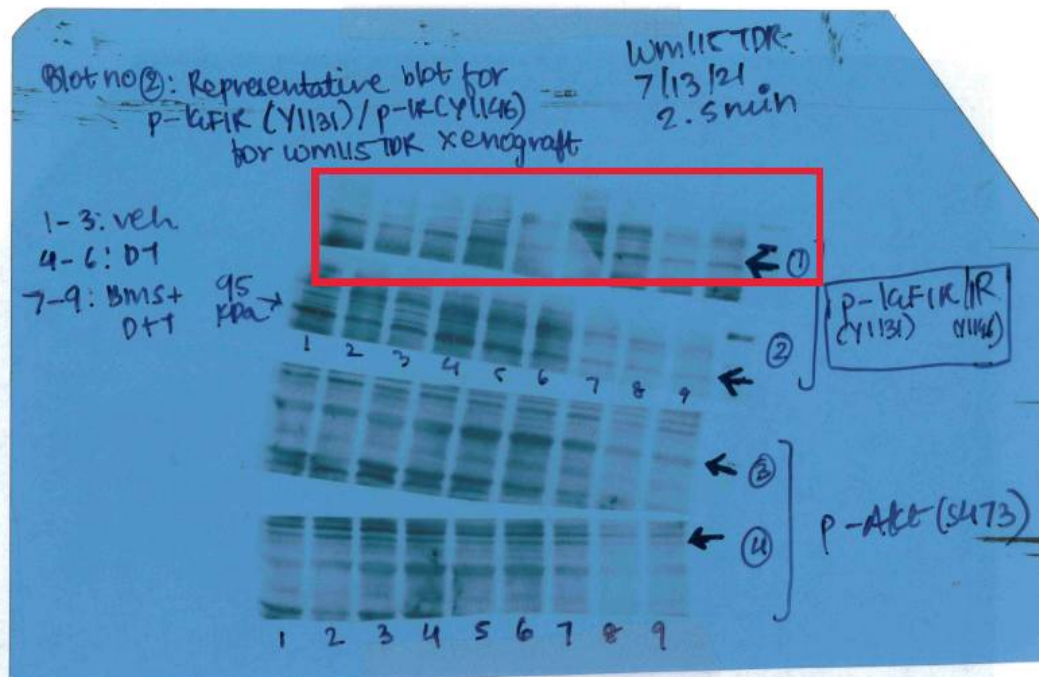

Wm115 TDR tumor lysate: p-Akt

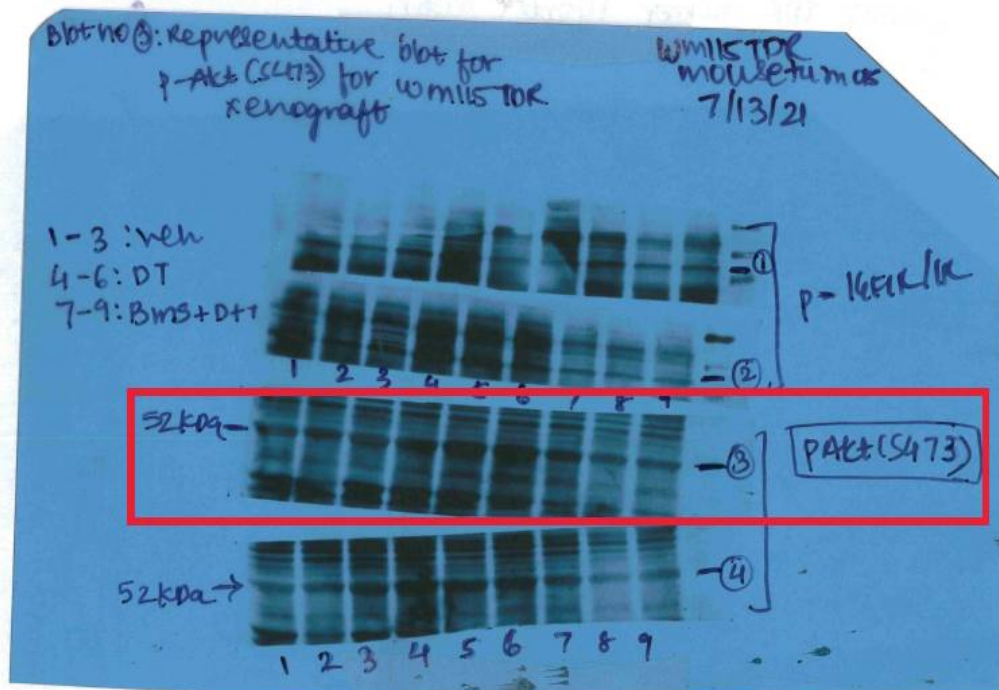

WM115 TDR tumor lysate: IgFIR, IR & Akt

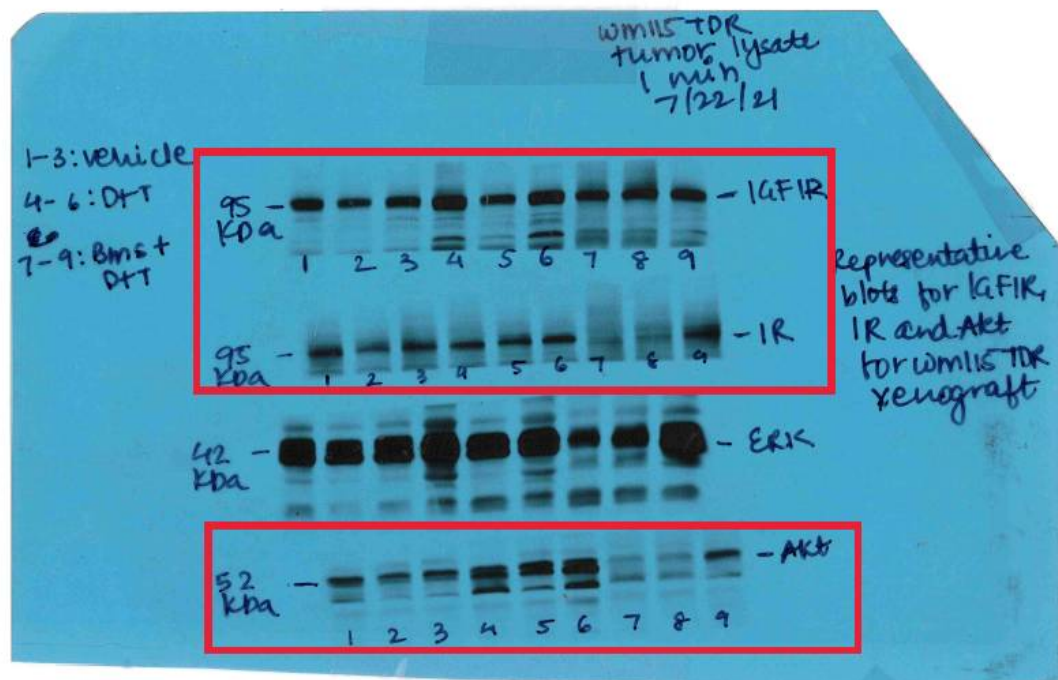

WM115 TDR tumor lysate: Actin

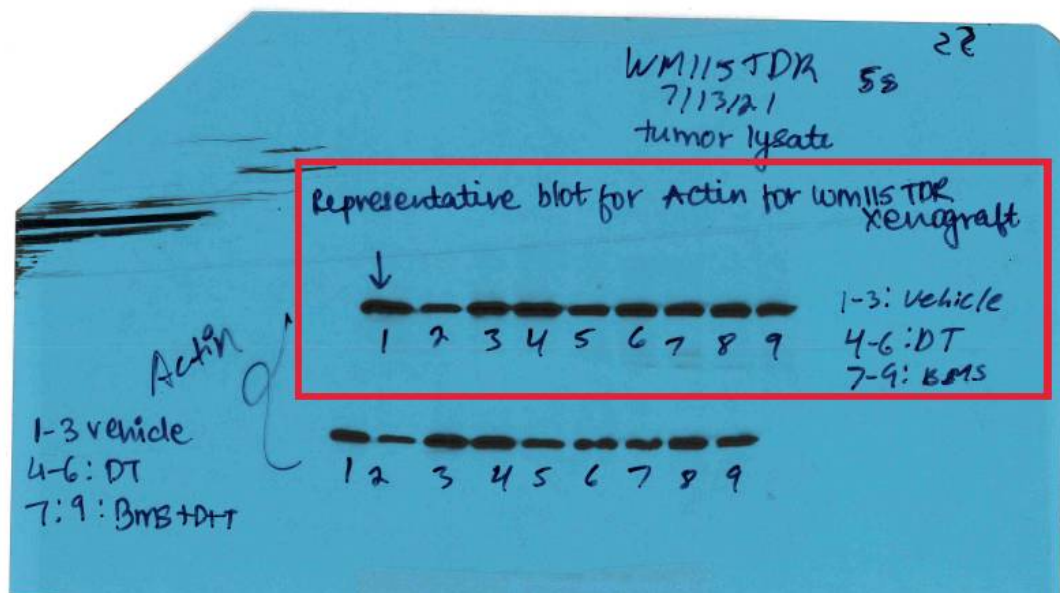

Figure S11. Whole blots for western blots in Figure 6E.

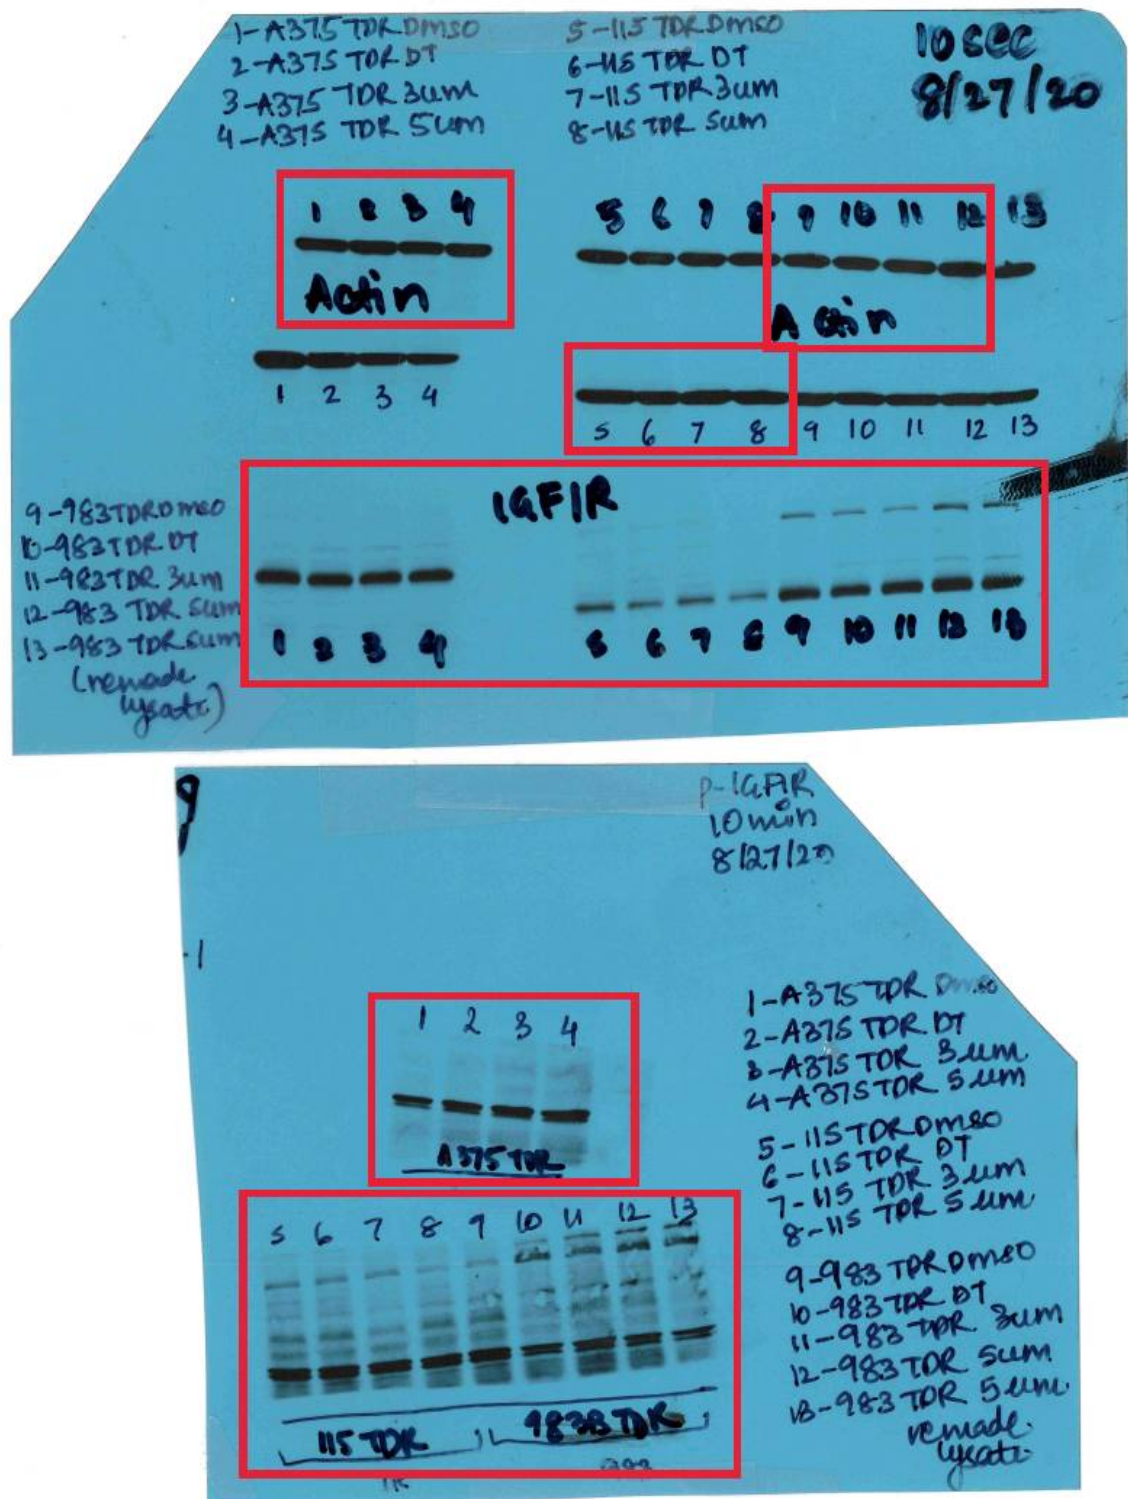

Figure S12. Whole blots for western blots in Figure S4.



Supplementary Figure 4  
WM115 TDR: p-IGFIR (Y1135)

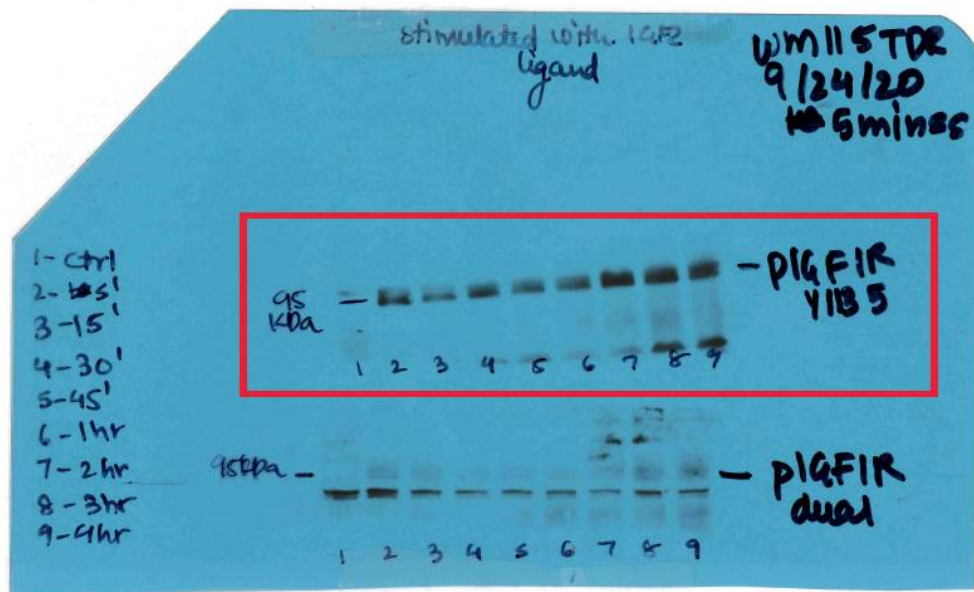

WM115 TDR: P-IGFIR (Y1131) / PIR (Y1146)

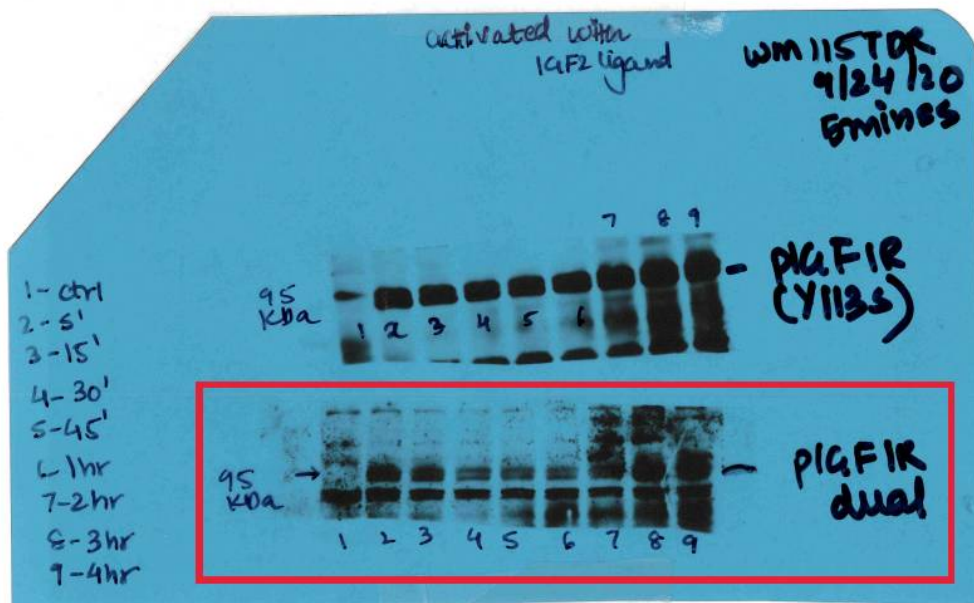



WM115 TDR: IGF1R

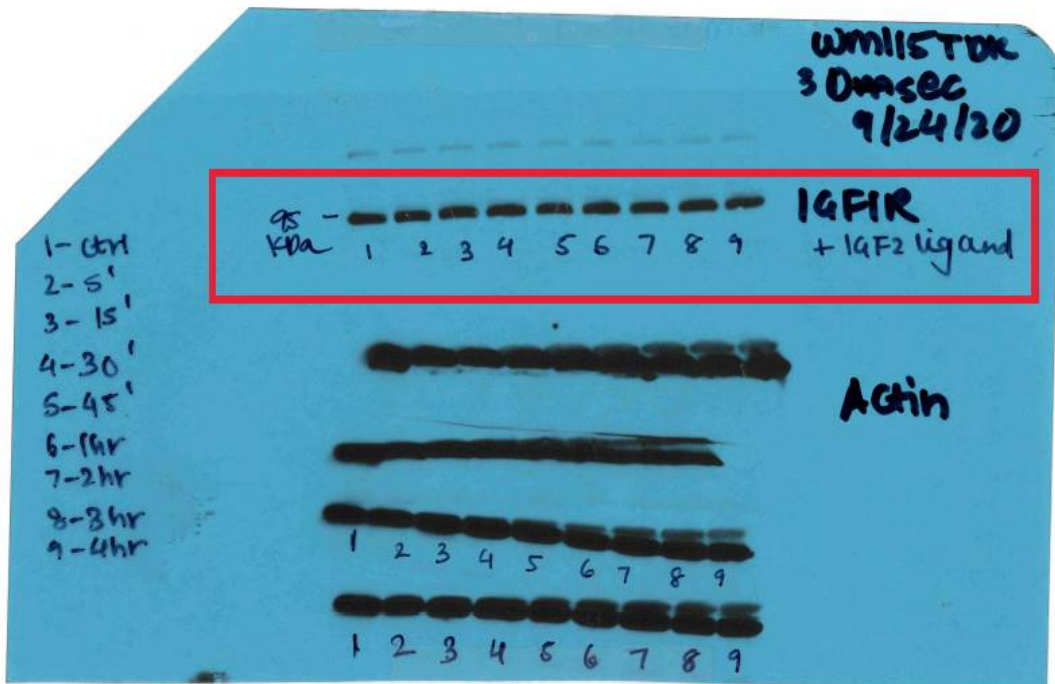

WM115 TDR: Actin & IR

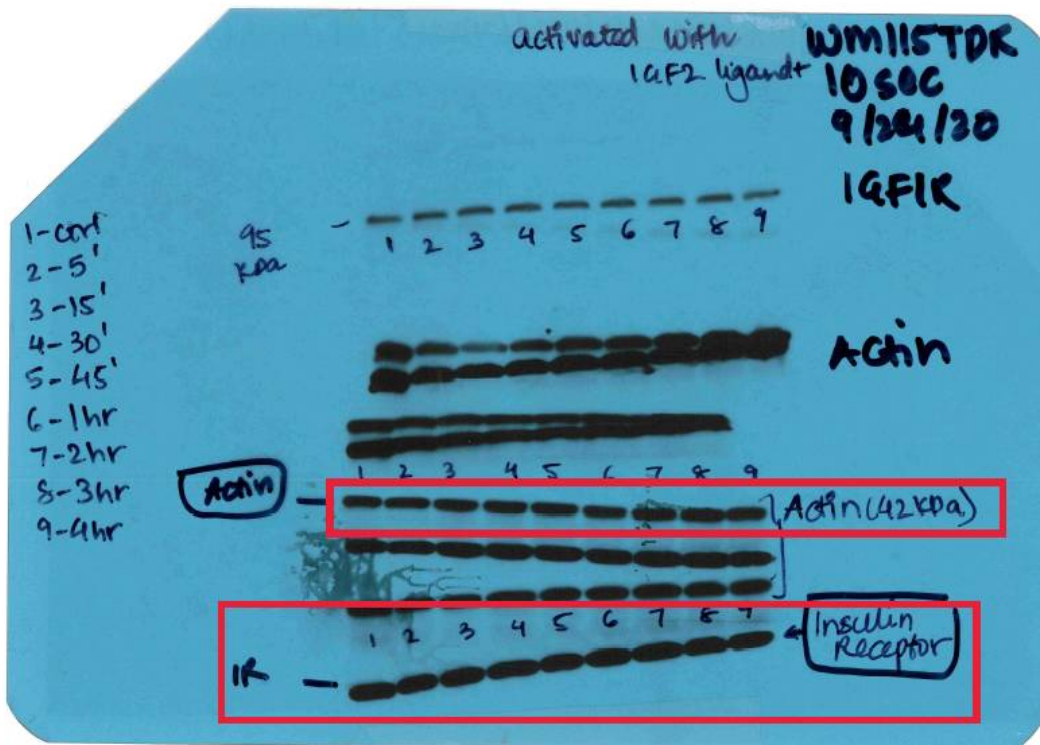

WM983B TDR: P-IGFIR (Y1135)

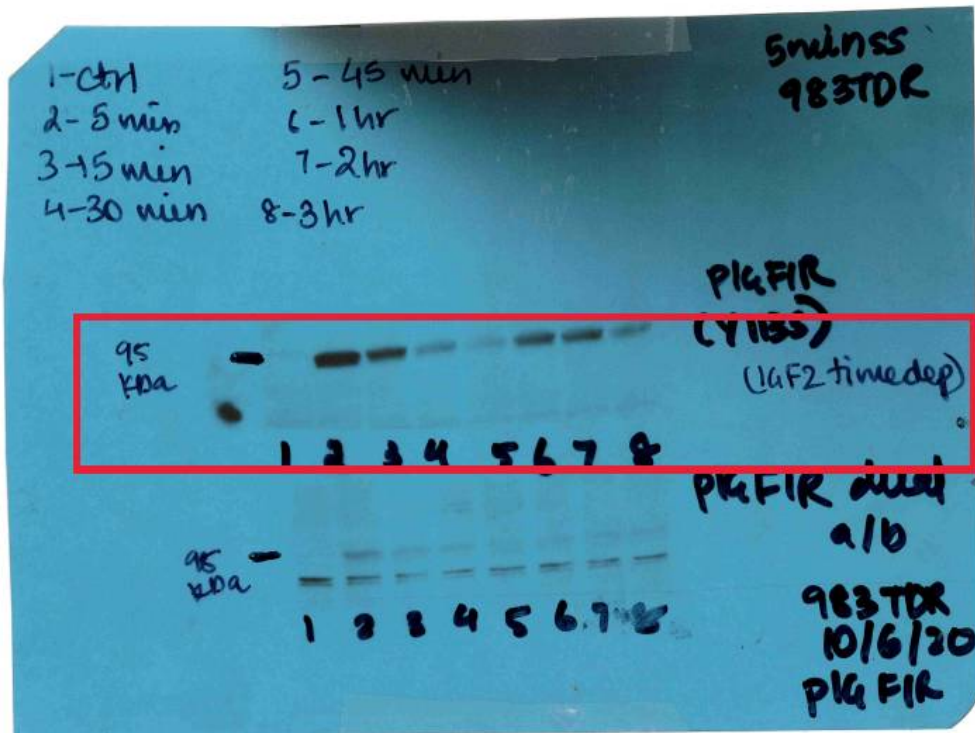

WM983B TDR: P-IGFIR (Y1135)/PIR (Y1146)

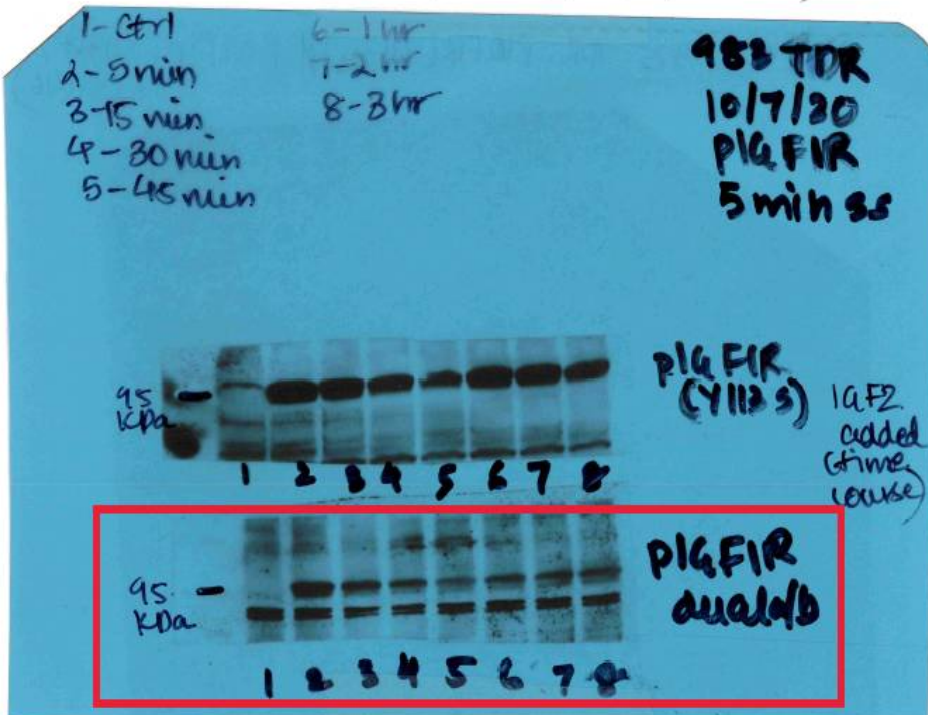

WM983B TDR: IR, IGFIR & Actin

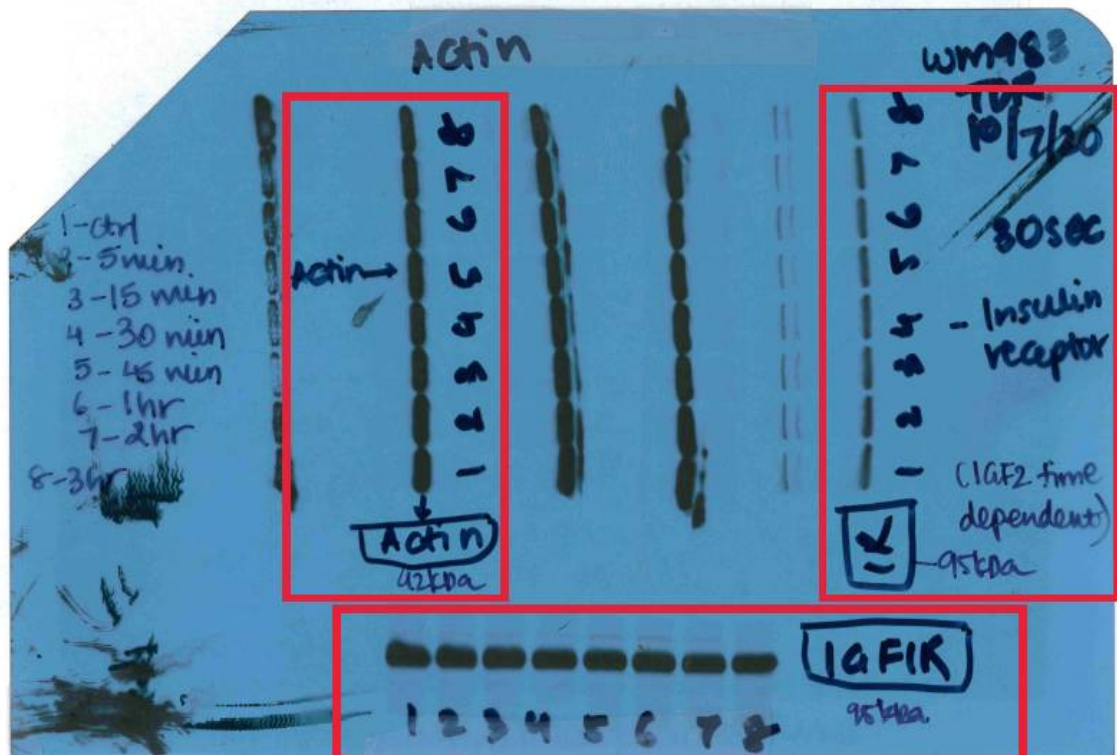

A375 TDR: PI3K (Y1135) / P-IGFIR (Y1131) / PIR (Y1146)

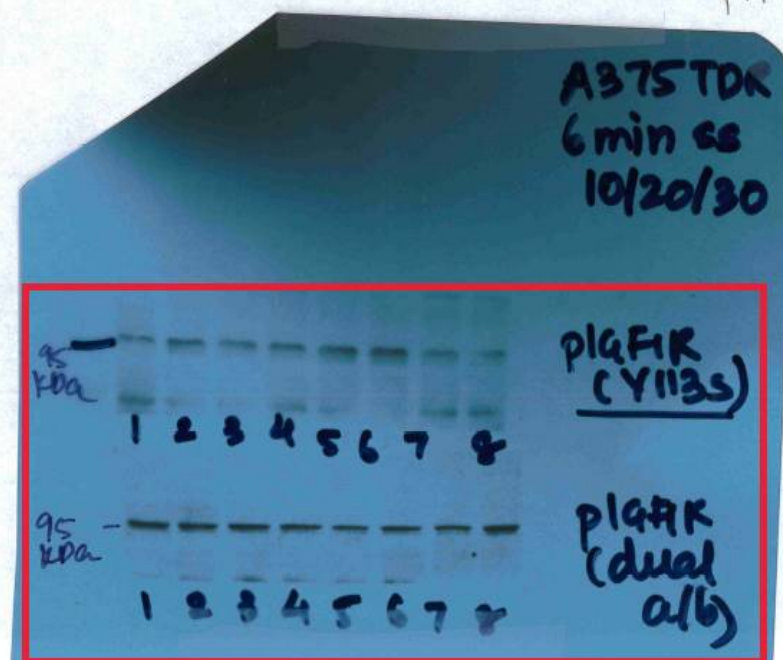



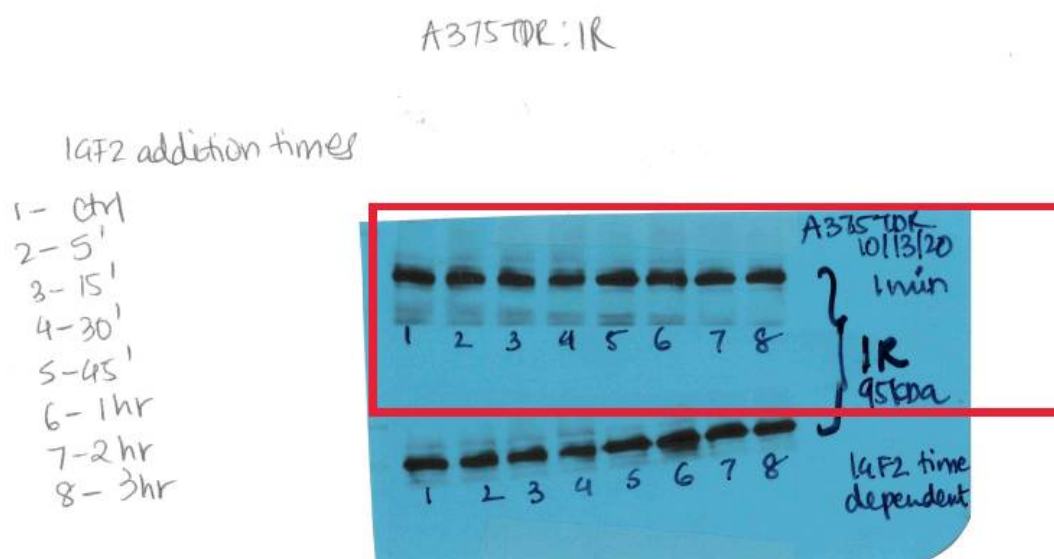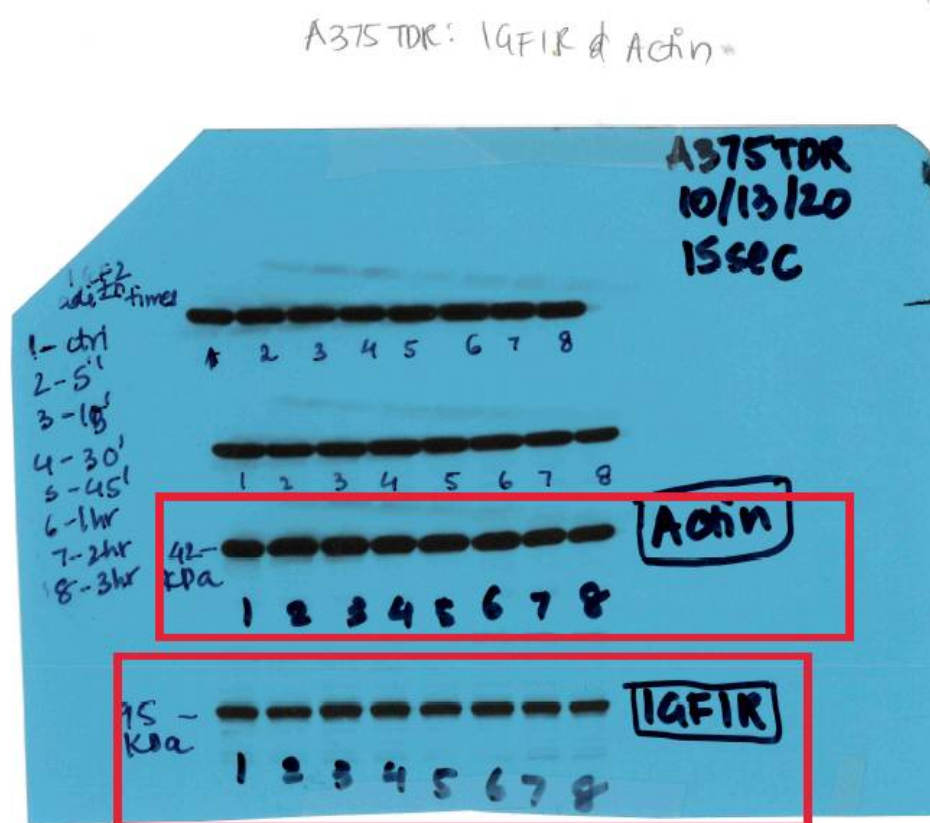

Figure S13. Whole blots for western blots in Figure S5.



**Table S1.** List of antibodies.

| <b>Antibody</b>                                                             | <b>Source</b>             | <b>Catalog number</b> |
|-----------------------------------------------------------------------------|---------------------------|-----------------------|
| Phospho-p44/42 MAPK (Erk1/2) (Thr202/Tyr204)                                | Cell Signaling Technology | 9101                  |
| p44/42 MAPK (Erk1/2)                                                        | Cell Signaling Technology | 9102                  |
| $\beta$ -Actin                                                              | Cell Signaling Technology | 4970                  |
| Phospho-Akt (Ser473)                                                        | Cell Signaling Technology | 4060                  |
| Akt                                                                         | Cell Signaling Technology | 9272                  |
| Phospho-HER3/ErbB3 (Tyr1289)                                                | Cell Signaling Technology | 4791                  |
| Phospho-HER3/ErbB3 (Tyr1197)                                                | Cell Signaling Technology | 4561                  |
| HER3/ErbB3                                                                  | Cell Signaling Technology | 12708                 |
| Phospho-EGF Receptor (Tyr1068)                                              | Cell Signaling Technology | 2234                  |
| EGF Receptor                                                                | Cell Signaling Technology | 4267                  |
| IGF-I Receptor $\beta$                                                      | Cell Signaling Technology | 3027                  |
| Phospho-IGF-I Receptor $\beta$ (Tyr1135)                                    | Cell Signaling Technology | 3918                  |
| Insulin Receptor $\beta$                                                    | Cell Signaling Technology | 3025                  |
| Phospho-IGF-I Receptor $\beta$ (Tyr1131)/Insulin Receptor $\beta$ (Tyr1146) | Cell Signaling Technology | 3021                  |
| Phospho-Axl (Y779)                                                          | R&D Systems               | AF2228                |
| Axl                                                                         | Cell Signaling Technology | 8661                  |

**Table S2.** List of RT-PCR primers.

| <b>Gene</b>  | <b>Forward Primer Sequence</b> | <b>Reverse Primer Sequence</b> |
|--------------|--------------------------------|--------------------------------|
| IGF1R        | TCGACATCCGCAACGACTATC          | CCAGGGCGTAGTTGTAGAAGAG         |
| IGF1         | TCGGTAACTGACTTGAATGTCCA        | TCCTTTTCGCTTCCCTGTTTT          |
| IGF2         | GGGCAAGTTCTTCCAATATGA          | TCACTTCCGATTGCTGGC             |
| INSR         | AAAACGAGGCCCGAAGATTTC          | GAGCCCATAGACCCGGAAG            |
| NRG1         | GCTTCATGGTGAAAGACCTTTCA        | ATTACGTAGTTTTGGCAGCGATC        |
| HER3         | GGTGATGGGGAACCTTGAGAT          | CTGTCACTTCTCGAATCCACTG         |
| AXL          | GTGGGCAACCCAGGGAATATC          | GTAAGTGTCCCGTGTCTCGGAAAG       |
| GAS6         | GGTAGCTGAGTTTGACTTCCG          | GACAGCATCCCTGTTGACCTT          |
| PROTEIN S    | TCCTGGTTAGGAAGCGTCGT           | CCGTTTCCGGGTCATTTTCAAA         |
| ACTIN        | AAGGAGCCCCACGAGAAAAAT          | ACCGAACTTGCAATTGATTCCAG        |
| EGFR         | AGCTAACCATTATGGCAACA           | AGTTTTCAGTGAGTCAGCTCCAT        |
| HBEGF        | GAAAGACTTCCATCTAGTCACAAAGA     | GGGAGGCCCAATCCTAGA             |
| TGFA         | GGACAGCACTGCCAGAGA             | CAGGTGATTACAGGCCAAGTAG         |
| BETACELLULIN | TGCCCAAGCAATACAAGC             | CGTCTGCTCGGCCACC               |
| AMPHIREGULIN | ATATCACATTGGAGTCACTGCCCA       | GGGTCCATTGTCTTATGATCCAC        |
